# Supplementary material for: Single-cell RNA sequence presents atlas analysis for chondrocytes in the talus and reveals the potential mechanism in coping with mechanical stress
Source: Front Cell Dev Biol. 2022 Nov 10;10:1047119. doi: 10.3389/fcell.2022.1047119 (PMC9685414; doi:10.3389/fcell.2022.1047119)
Supplement: Supplementary file 3 [file Table3.XLSX]

## Sheet: HTC-A
Category	Description	enrichment	pvalue	count	Symbols
KEGG Pathway	PPAR signaling pathway	0.08	3.24189e-05	6	DBI,ACSL3,HMGCS1,SCD,UBC,FADS1
KEGG Pathway	Complement and coagulation cascades	0.0588235	5.9271e-05	5	SERPING1,CD59,CFH,SERPINA5,SERPINA1
KEGG Pathway	ECM-receptor interaction	0.0568182	6.99716e-05	5	CHAD,COL2A1,COL9A2,COL9A3,COMP
KEGG Pathway	Steroid biosynthesis	0.15	0.000118815	3	FDFT1,MSMO1,SQLE
KEGG Pathway	Terpenoid backbone biosynthesis	0.136364	0.00015937	3	FDPS,HMGCS1,IDI1
KEGG Pathway	Mineral absorption	0.0833333	0.00020718	5	HMOX1,MT1F,TF,CYBRD1,ACSL3
KEGG Pathway	Pertussis	0.105263	0.000513455	8	SERPING1,CALM1,CD14,CFL1,CTSK,MAP2K6,LDLR,SCD
KEGG Pathway	Fluid shear stress and atherosclerosis	0.0359712	0.000589764	5	CALM1,GSTP1,HMOX1,MAP2K6,SDC2
KEGG Pathway	Phagosome	0.0657895	0.000882706	10	CD14,COMP,DYNC1I1,TUBB2A,TUBA1A,MAP2K6,ATP5F1E,CALM1,UBC,HNRNPA2B1
KEGG Pathway	Ferroptosis	0.0731707	0.00103148	3	ACSL3,HMOX1,TF
KEGG Pathway	Fatty acid metabolism	0.0526316	0.00267606	3	ACSL3,FADS1,SCD
KEGG Pathway	Focal adhesion	0.0248756	0.0030061	5	CHAD,COL2A1,COL9A2,COL9A3,COMP
KEGG Pathway	Salmonella infection	0.0200803	0.00737325	5	CD14,DYNC1I1,MAP2K6,TUBB2A,TUBA1A
KEGG Pathway	Parkinson disease	0.018797	0.00964083	5	ATP5F1E,CALM1,TUBB2A,UBC,TUBA1A
KEGG Pathway	Protein processing in endoplasmic reticulum	0.0233918	0.0096778	4	CRYAB,RPN2,RRBP1,FBXO2
KEGG Pathway	TGF-beta signaling pathway	0.0319149	0.0107695	3	DCN,LTBP1,FST
KEGG Pathway	Protein digestion and absorption	0.0291262	0.0137702	3	COL2A1,COL9A2,COL9A3
KEGG Pathway	Toll-like receptor signaling pathway	0.0288462	0.01413	3	CD14,CTSK,MAP2K6
KEGG Pathway	Proteoglycans in cancer	0.0195122	0.0177492	4	CD63,DCN,LUM,SDC2
KEGG Pathway	Lipid and atherosclerosis	0.0186047	0.0207317	4	CALM1,CD14,LDLR,MAP2K6
KEGG Pathway	Human papillomavirus infection	0.0151057	0.0226582	5	CHAD,COL2A1,COL9A2,COL9A3,COMP
KEGG Pathway	Pathways of neurodegeneration - multiple diseases	0.012605	0.0285549	6	ATP5F1E,CALM1,MAP2K6,TUBB2A,UBC,TUBA1A
KEGG Pathway	PI3K-Akt signaling pathway	0.0141243	0.0291309	5	CHAD,COL2A1,COL9A2,COL9A3,COMP
KEGG Pathway	Alcoholic liver disease	0.0211268	0.0317805	3	CD14,MAP2K6,SCD
KEGG Pathway	Amyotrophic lateral sclerosis	0.0137363	0.0322752	5	ATP5F1E,HNRNPA2B1,MAP2K6,TUBB2A,TUBA1A

## Sheet: HTC-B
Category	Description	enrichment	pvalue	count	Symbols
KEGG Pathway	Parkinson disease	0.150376	7.14552e-11	40	ATP5F1E,CALM1,CALM2,CAMK2G,COX6C,DUSP1,GNAL,NDUFA1,NDUFA3,NDUFB1,NDUFB7,NDUFB10,NDUFC2,NDUFS6,PSMA7,PSMB3,PSMB6,PSMC5,PARK7,CAPN2,GPX3,HSD17B10,PLCB4,MAP2K6,FZD9,DKK1,PIK3R1,ATP5ME,ATP5MF,COX17,ACTB,FGFR1,PNPLA2,POLR2K,POLR2L,CAV1,CAV2,ANXA7,AKR1C2,HMOX1
KEGG Pathway	Pathways of neurodegeneration - multiple diseases	0.0504202	3.09874e-10	24	ATP5F1E,CALM1,CALM2,CAMK2G,CAPN2,COX6C,GPX3,HSD17B10,NDUFA1,NDUFA3,NDUFB1,NDUFB7,NDUFB10,NDUFC2,NDUFS6,PLCB4,MAP2K6,PSMA7,PSMB3,PSMB6,PSMC5,FZD9,PARK7,DKK1
KEGG Pathway	Alzheimer disease	0.0546875	9.69817e-10	21	ATP5F1E,CALM1,CALM2,CAPN2,COX6C,HSD17B10,NDUFA1,NDUFA3,NDUFB1,NDUFB7,NDUFB10,NDUFC2,NDUFS6,PIK3R1,PLCB4,PSMA7,PSMB3,PSMB6,PSMC5,FZD9,DKK1
KEGG Pathway	Oxidative phosphorylation	0.0895522	1.95602e-08	12	ATP5F1E,ATP5ME,COX6C,NDUFA1,NDUFA3,NDUFB1,NDUFB7,NDUFB10,NDUFC2,NDUFS6,ATP5MF,COX17
KEGG Pathway	Thermogenesis	0.0646552	2.81425e-08	15	ACTB,ATP5F1E,ATP5ME,COX6C,FGFR1,NDUFA1,NDUFA3,NDUFB1,NDUFB7,NDUFB10,NDUFC2,NDUFS6,ATP5MF,COX17,PNPLA2
KEGG Pathway	Fluid shear stress and atherosclerosis	0.0935252	2.95241e-08	13	ACTB,CALM1,CALM2,CAV1,CAV2,DUSP1,GSTP1,HMOX1,IL1R1,MEF2C,PIK3R1,MAP2K6,FZD9
KEGG Pathway	Huntington disease	0.0555556	3.13798e-08	17	ATP5F1E,COX6C,GPX3,NDUFA1,NDUFA3,NDUFB1,NDUFB7,NDUFB10,NDUFC2,NDUFS6,PLCB4,POLR2K,POLR2L,PSMA7,PSMB3,PSMB6,PSMC5
KEGG Pathway	Prion disease	0.0586081	3.83109e-08	16	ATP5F1E,CAV1,CAV2,COX6C,NDUFA1,NDUFA3,NDUFB1,NDUFB7,NDUFB10,NDUFC2,NDUFS6,PIK3R1,PSMA7,PSMB3,PSMB6,PSMC5
KEGG Pathway	Proteoglycans in cancer	0.0682927	4.1418e-08	14	ACTB,CAMK2G,CAV1,CAV2,CD63,FGF2,FGFR1,FLNA,LUM,PIK3R1,TIMP3,FZD9,IQGAP1,VAV3
KEGG Pathway	Mineral absorption	0.466667	2.15008e-07	28	ATOX1,ATP1A1,ATP1B1,ATP1B3,HMOX1,MT1F,TF,CYBRD1,ACTB,CALM1,CALM2,CAMK2G,PLCB4,CST3,KCNMA1,NR4A1,PDE4B,PIK3R1,FXYD1,SOX9,VAV3,SCN1B,TPM2,SLC9A3R2,MEF2C,GPX3,COX6C,COL10A1
KEGG Pathway	Amyotrophic lateral sclerosis	0.0467033	3.73761e-07	17	ACTB,ANXA7,ATP5F1E,COX6C,GPX3,NDUFA1,NDUFA3,NDUFB1,NDUFB7,NDUFB10,NDUFC2,NDUFS6,MAP2K6,PSMA7,PSMB3,PSMB6,PSMC5
KEGG Pathway	Gastric acid secretion	0.105263	1.37003e-06	8	ACTB,ATP1A1,ATP1B1,ATP1B3,CALM1,CALM2,CAMK2G,PLCB4
KEGG Pathway	Focal adhesion	0.079602	1.6145e-06	16	ACTB,CAPN2,CAV1,CAV2,CCND3,CHAD,FLNA,IBSP,PIK3R1,SPP1,VAV3,MYL12A,FGF2,FGFR1,NR4A1,NTRK2
KEGG Pathway	Diabetic cardiomyopathy	0.0591133	1.79065e-06	12	ATP5F1E,CAMK2G,COX6C,NDUFA1,NDUFA3,NDUFB1,NDUFB7,NDUFB10,NDUFC2,NDUFS6,PIK3R1,PLCB4
KEGG Pathway	Chemical carcinogenesis - reactive oxygen species	0.0538117	4.73164e-06	12	ATP5F1E,COX6C,AKR1C2,HMOX1,NDUFA1,NDUFA3,NDUFB1,NDUFB7,NDUFB10,NDUFC2,NDUFS6,PIK3R1
KEGG Pathway	Salivary secretion	0.0869565	5.84899e-06	8	ATP1A1,ATP1B1,ATP1B3,CALM1,CALM2,CST3,KCNMA1,PLCB4
KEGG Pathway	Aldosterone synthesis and secretion	0.0816327	9.36505e-06	8	ATP1A1,ATP1B1,ATP1B3,CALM1,CALM2,CAMK2G,NR4A1,PLCB4
KEGG Pathway	cAMP signaling pathway	0.0497738	2.43292e-05	11	ATP1A1,ATP1B1,ATP1B3,CALM1,CALM2,CAMK2G,PDE4B,PIK3R1,FXYD1,SOX9,VAV3
KEGG Pathway	Adrenergic signaling in cardiomyocytes	0.06	3.14204e-05	9	ATP1A1,ATP1B1,ATP1B3,CALM1,CALM2,CAMK2G,PLCB4,SCN1B,TPM2
KEGG Pathway	Non-alcoholic fatty liver disease	0.0580645	4.06492e-05	9	COX6C,NDUFA1,NDUFA3,NDUFB1,NDUFB7,NDUFB10,NDUFC2,NDUFS6,PIK3R1
KEGG Pathway	Aldosterone-regulated sodium reabsorption	0.135135	4.08691e-05	5	ATP1A1,ATP1B1,ATP1B3,PIK3R1,SLC9A3R2
KEGG Pathway	Inflammatory mediator regulation of TRP channels	0.336735	8.03806e-05	33	CALM1,CALM2,CAMK2G,IL1R1,PIK3R1,PLCB4,MAP2K6,ACTB,FGF2,FGFR1,VAV3,CTSB,KCNMA1,MEF2C,MYL6,NTRK2,BEX3,COMT,GNAL,RAMP1,CCN2,SPP1,FZD9,CAPN2,CCND3,CFL1,ELOB,RBX1,SLC29A1,H3-3A,H2AC20,KRT18,EGR3
KEGG Pathway	Carbohydrate digestion and absorption	0.106383	0.000132	5	ATP1A1,ATP1B1,ATP1B3,PIK3R1,PLCB4
KEGG Pathway	HIF-1 signaling pathway	0.155963	0.000156954	17	CAMK2G,HMOX1,PIK3R1,ELOB,TF,TIMP1,RBX1,CCND3,FRZB,PLCB4,FZD9,DKK1,CALM1,CALM2,FGF2,FGFR1,GSTP1
KEGG Pathway	Retrograde endocannabinoid signaling	0.0540541	0.000178369	8	NDUFA1,NDUFA3,NDUFB1,NDUFB7,NDUFB10,NDUFC2,NDUFS6,PLCB4
KEGG Pathway	Insulin secretion	0.0697674	0.000296604	6	ATP1A1,ATP1B1,ATP1B3,CAMK2G,KCNMA1,PLCB4
KEGG Pathway	Rap1 signaling pathway	0.0428571	0.000403594	9	ACTB,CALM1,CALM2,FGF2,FGFR1,PIK3R1,PLCB4,MAP2K6,VAV3
KEGG Pathway	cGMP-PKG signaling pathway	0.0479042	0.000403949	8	ATP1A1,ATP1B1,ATP1B3,CALM1,CALM2,KCNMA1,MEF2C,PLCB4
KEGG Pathway	Regulation of actin cytoskeleton	0.0504587	0.000528886	11	ACTB,CFL1,FGF2,FGFR1,PIK3R1,IQGAP1,VAV3,MYL12A,SCIN,CAMK2G,NGEF
KEGG Pathway	Renin secretion	0.0724638	0.000801409	5	CALM1,CALM2,CTSB,KCNMA1,PLCB4
KEGG Pathway	Thyroid hormone synthesis	0.0666667	0.00116947	5	ATP1A1,ATP1B1,ATP1B3,GPX3,PLCB4
KEGG Pathway	MAPK signaling pathway	0.0340136	0.00117424	10	DUSP1,FGF2,FGFR1,FLNA,NR4A1,IL1R1,STMN1,MEF2C,NTRK2,MAP2K6
KEGG Pathway	Oxytocin signaling pathway	0.0454545	0.00125383	7	ACTB,CALM1,CALM2,CAMK2G,MEF2C,MYL6,PLCB4
KEGG Pathway	Shigellosis	0.0688259	0.00127674	17	ACTB,CAPN2,CAPNS1,H3-3A,IL1R1,PIK3R1,PLCB4,RBX1,MYL12A,GNAL,PRDX1,CD99,VAV3,VAMP8,HMGB1,H2AC20,SPP1
KEGG Pathway	Proteasome	0.130435	0.00137396	6	PSMA7,PSMB3,PSMB6,PSMC5,PIK3R1,PLCB4
KEGG Pathway	Neurotrophin signaling pathway	0.0504202	0.00164174	6	CALM1,CALM2,CAMK2G,NTRK2,PIK3R1,BEX3
KEGG Pathway	Proximal tubule bicarbonate reclamation	0.130435	0.00173661	3	ATP1A1,ATP1B1,ATP1B3
KEGG Pathway	Thyroid hormone signaling pathway	0.0495868	0.00178699	6	ACTB,ATP1A1,ATP1B1,ATP1B3,PIK3R1,PLCB4
KEGG Pathway	Wnt signaling pathway	0.0419162	0.00199274	7	CAMK2G,CCND3,FRZB,PLCB4,FZD9,RBX1,DKK1
KEGG Pathway	Cardiac muscle contraction	0.0574713	0.00226109	5	ATP1A1,ATP1B1,ATP1B3,COX6C,TPM2
KEGG Pathway	Protein processing in endoplasmic reticulum	0.0409357	0.00227713	7	CAPN2,CRYAB,RPN2,SSR4,RBX1,BCAP31,FBXO2
KEGG Pathway	Endocrine and other factor-regulated calcium reabsorption	0.0754717	0.00232792	4	ATP1A1,ATP1B1,ATP1B3,PLCB4
KEGG Pathway	Dopaminergic synapse	0.0454545	0.00276704	6	CALM1,CALM2,CAMK2G,COMT,GNAL,PLCB4
KEGG Pathway	Lysosome	0.0454545	0.00276704	6	CD63,AP3S1,CTSB,LAMP1,NPC2,GNPTG
KEGG Pathway	Vascular smooth muscle contraction	0.0447761	0.00298147	6	CALM1,CALM2,KCNMA1,MYL6,PLCB4,RAMP1
KEGG Pathway	GnRH signaling pathway	0.0537634	0.00302267	5	CALM1,CALM2,CAMK2G,PLCB4,MAP2K6
KEGG Pathway	Apelin signaling pathway	0.0431655	0.00357176	6	CALM1,CALM2,CCN2,MEF2C,PLCB4,SPP1
KEGG Pathway	Autophagy - animal	0.0425532	0.00383066	6	CTSB,HMGB1,LAMP1,PIK3R1,VAMP8,GABARAPL2
KEGG Pathway	Calcium signaling pathway	0.0333333	0.00402934	8	CALM1,CALM2,CAMK2G,FGF2,FGFR1,GNAL,NTRK2,PLCB4
KEGG Pathway	Spinocerebellar ataxia	0.041958	0.00410323	6	PIK3R1,PLCB4,PSMA7,PSMB3,PSMB6,PSMC5
KEGG Pathway	Signaling pathways regulating pluripotency of stem cells	0.048951	0.00410323	7	DLX5,FGF2,FGFR1,PIK3R1,SKIL,FZD9,SLC7A5
KEGG Pathway	Melanogenesis	0.049505	0.00430547	5	CALM1,CALM2,CAMK2G,PLCB4,FZD9
KEGG Pathway	Pathways in cancer	0.0244821	0.00433838	13	CALM1,CALM2,CAMK2G,CCND3,FGF2,FGFR1,GSTP1,HMOX1,PIK3R1,PLCB4,ELOB,FZD9,RBX1
KEGG Pathway	Pancreatic secretion	0.0490196	0.00448932	5	ATP1A1,ATP1B1,ATP1B3,KCNMA1,PLCB4
KEGG Pathway	Amoebiasis	0.0490196	0.00448932	5	GNAL,IL1R1,PRDX1,PIK3R1,PLCB4
KEGG Pathway	Salmonella infection	0.0321285	0.00501437	8	ACTB,ANXA2,FLNA,MAP2K6,S100A10,MYL12A,AHNAK,DYNLRB1
KEGG Pathway	Long-term potentiation	0.0597015	0.00543484	4	CALM1,CALM2,CAMK2G,PLCB4
KEGG Pathway	Cellular senescence	0.0384615	0.0062372	6	CALM1,CALM2,CAPN2,CCND3,PIK3R1,MAP2K6
KEGG Pathway	Leukocyte transendothelial migration	0.0438596	0.00715119	5	ACTB,CD99,PIK3R1,VAV3,MYL12A
KEGG Pathway	Human immunodeficiency virus 1 infection	0.0330189	0.00732429	7	CALM1,CALM2,CFL1,PIK3R1,MAP2K6,ELOB,RBX1
KEGG Pathway	Lipid and atherosclerosis	0.0325581	0.00788288	7	CALM1,CALM2,CAMK2G,PIK3R1,PLCB4,MAP2K6,VAV3
KEGG Pathway	Glioma	0.0533333	0.00807521	4	CALM1,CALM2,CAMK2G,PIK3R1
KEGG Pathway	Bacterial invasion of epithelial cells	0.0519481	0.00884603	4	ACTB,CAV1,CAV2,PIK3R1
KEGG Pathway	Platelet activation	0.0403226	0.0100836	5	ACTB,PIK3R1,PLCB4,VAMP8,MYL12A
KEGG Pathway	Complement and coagulation cascades	0.0470588	0.0124045	4	CD59,F13A1,SERPINA1,TFPI
KEGG Pathway	PI3K-Akt signaling pathway	0.0254237	0.0130251	9	CCND3,CHAD,FGF2,FGFR1,NR4A1,IBSP,NTRK2,PIK3R1,SPP1
KEGG Pathway	Alcoholism	0.0320856	0.01441	6	CALM1,CALM2,SLC29A1,H3-3A,NTRK2,H2AC20
KEGG Pathway	Estrogen signaling pathway	0.0362319	0.0154389	5	CALM1,CALM2,KRT18,PIK3R1,PLCB4
KEGG Pathway	Neutrophil extracellular trap formation	0.0315789	0.0154719	6	ACTB,H3-3A,HMGB1,PIK3R1,PLCB4,H2AC20
KEGG Pathway	Cholesterol metabolism	0.06	0.0156131	3	TSPO,LRPAP1,NPC2
KEGG Pathway	Phosphatidylinositol signaling system	0.0412371	0.0192666	4	CALM1,CALM2,PIK3R1,PLCB4
KEGG Pathway	Circadian entrainment	0.0412371	0.0192666	4	CALM1,CALM2,CAMK2G,PLCB4
KEGG Pathway	Fc gamma R-mediated phagocytosis	0.0412371	0.0192666	4	CFL1,PIK3R1,VAV3,SCIN
KEGG Pathway	Protein digestion and absorption	0.038835	0.0234264	4	ATP1A1,ATP1B1,ATP1B3,COL10A1
KEGG Pathway	C-type lectin receptor signaling pathway	0.0384615	0.0241685	4	CALM1,CALM2,EGR3,PIK3R1
KEGG Pathway	Parathyroid hormone synthesis, secretion and action	0.0377358	0.0256951	4	FGFR1,MEF2C,PDE4B,PLCB4
KEGG Pathway	Glucagon signaling pathway	0.0373832	0.0264796	4	CALM1,CALM2,CAMK2G,PLCB4
KEGG Pathway	Necroptosis	0.0314465	0.0265745	5	CAMK2G,CAPN2,HMGB1,PPIA,H2AC20
KEGG Pathway	GnRH secretion	0.046875	0.0298351	3	PIK3R1,PLCB4,SPP1
KEGG Pathway	Human cytomegalovirus infection	0.0266667	0.0320643	6	CALM1,CALM2,IL1R1,PIK3R1,PLCB4,MAP2K6
KEGG Pathway	Hepatocellular carcinoma	0.0297619	0.0325914	5	ACTB,GSTP1,HMOX1,PIK3R1,FZD9
KEGG Pathway	Amphetamine addiction	0.0434783	0.0361254	3	CALM1,CALM2,CAMK2G
KEGG Pathway	Renal cell carcinoma	0.0434783	0.0361254	3	PIK3R1,ELOB,RBX1
KEGG Pathway	Ras signaling pathway	0.0258621	0.0363893	6	CALM1,CALM2,FGF2,FGFR1,NTRK2,PIK3R1
KEGG Pathway	Central carbon metabolism in cancer	0.0428571	0.0374589	3	FGFR1,PIK3R1,SLC7A5
KEGG Pathway	Adherens junction	0.0422535	0.0388173	3	ACTB,FGFR1,IQGAP1
KEGG Pathway	Melanoma	0.0416667	0.0402005	3	FGF2,FGFR1,PIK3R1
KEGG Pathway	Axon guidance	0.0274725	0.0435212	5	CAMK2G,CFL1,PIK3R1,MYL12A,NGEF
KEGG Pathway	Pertussis	0.0394737	0.0459789	3	CALM1,CALM2,CFL1
KEGG Pathway	Oocyte meiosis	0.0305344	0.0496379	4	CALM1,CALM2,CAMK2G,RBX1

## Sheet: RegC
Category	Description	enrichment	pvalue	count	Symbols
KEGG Pathway	TGF-beta signaling pathway	0.0851064	4.03133e-07	8	BMP2,ID1,ID3,INHBA,NBL1,TGFBR2,THBS1,FGFR2
KEGG Pathway	Cellular senescence	0.147436	1.02816e-06	23	SLC25A6,ZFP36L2,CCND2,HLA-B,HLA-C,HLA-E,TGFBR2,SQSTM1,B2M,ICAM1,NFKBIA,C1R,THBS1,TUBA1B,COLEC12,PSME1,RCAN1,UBB,CPE,PMAIP1,VCAM1,AKAP13,FGFR2
KEGG Pathway	Human T-cell leukemia virus 1 infection	0.0405405	1.52538e-06	9	SLC25A6,B2M,CCND2,HLA-B,HLA-C,HLA-E,ICAM1,NFKBIA,TGFBR2
KEGG Pathway	Phagosome	0.0460526	1.00685e-05	7	C1R,HLA-B,HLA-C,HLA-E,THBS1,TUBA1B,COLEC12
KEGG Pathway	Human papillomavirus infection	0.0332326	3.75006e-05	11	CCND2,COL6A2,HLA-B,HLA-C,HLA-E,IRF1,THBS1,ITGA10,MAML2,PMAIP1,FGFR2
KEGG Pathway	Antigen processing and presentation	0.0641026	4.04941e-05	5	B2M,HLA-B,HLA-C,HLA-E,PSME1
KEGG Pathway	Kaposi sarcoma-associated herpesvirus infection	0.0360825	4.8343e-05	7	RCAN1,HLA-B,HLA-C,HLA-E,ICAM1,NFKBIA,UBB
KEGG Pathway	Type I diabetes mellitus	0.0930233	5.73841e-05	4	CPE,HLA-B,HLA-C,HLA-E
KEGG Pathway	Epstein-Barr virus infection	0.0346535	6.23833e-05	7	B2M,CCND2,HLA-B,HLA-C,HLA-E,ICAM1,NFKBIA
KEGG Pathway	Malaria	0.18	0.000104294	9	CD81,ICAM1,THBS1,VCAM1,IRF1,NFKBIA,NFE2L2,SOD2,TGFBR2
KEGG Pathway	Hedgehog signaling pathway	0.0714286	0.000162611	4	CCND2,GAS1,GLI3,CDON
KEGG Pathway	Viral myocarditis	0.0666667	0.000212661	4	HLA-B,HLA-C,HLA-E,ICAM1
KEGG Pathway	Viral carcinogenesis	0.0294118	0.00050667	6	CCND2,HLA-B,HLA-C,HLA-E,NFKBIA,PMAIP1
KEGG Pathway	Fluid shear stress and atherosclerosis	0.100719	0.000608299	14	GSTM3,ICAM1,NFE2L2,VCAM1,SQSTM1,BMP2,CCND2,FGFR2,GLI3,NFKBIA,PMAIP1,TGFBR2,SLC25A6,SOD2
KEGG Pathway	Cell adhesion molecules	0.033557	0.000832296	5	HLA-B,HLA-C,HLA-E,ICAM1,VCAM1
KEGG Pathway	Allograft rejection	0.0789474	0.00084143	3	HLA-B,HLA-C,HLA-E
KEGG Pathway	Human cytomegalovirus infection	0.0266667	0.00084522	6	B2M,HLA-B,HLA-C,HLA-E,NFKBIA,AKAP13
KEGG Pathway	Graft-versus-host disease	0.0714286	0.00112888	3	HLA-B,HLA-C,HLA-E
KEGG Pathway	Pathways in cancer	0.0169492	0.00121419	9	BMP2,CCND2,FGFR2,GLI3,GSTM3,NFE2L2,NFKBIA,PMAIP1,TGFBR2
KEGG Pathway	Autoimmune thyroid disease	0.0566038	0.00221539	3	HLA-B,HLA-C,HLA-E
KEGG Pathway	TNF signaling pathway	0.0357143	0.00222831	4	ICAM1,IRF1,NFKBIA,VCAM1
KEGG Pathway	Transcriptional misregulation in cancer	0.0414508	0.00260026	8	CCND2,ERG,MAF,TGFBR2,NFKBIZ,BMP2,ID1,SOD2
KEGG Pathway	Human immunodeficiency virus 1 infection	0.0235849	0.00388293	5	B2M,HLA-B,HLA-C,HLA-E,NFKBIA
KEGG Pathway	Natural killer cell mediated cytotoxicity	0.0305344	0.00391579	4	HLA-B,HLA-C,HLA-E,ICAM1
KEGG Pathway	Lipid and atherosclerosis	0.0232558	0.00412048	5	ICAM1,NFE2L2,NFKBIA,SOD2,VCAM1
KEGG Pathway	Chemical carcinogenesis - reactive oxygen species	0.0224215	0.00480452	5	SLC25A6,GSTM3,NFE2L2,NFKBIA,SOD2
KEGG Pathway	Signaling pathways regulating pluripotency of stem cells	0.027972	0.00533783	4	FGFR2,ID1,ID3,INHBA
KEGG Pathway	p53 signaling pathway	0.0410959	0.00548023	3	CCND2,PMAIP1,THBS1
KEGG Pathway	Hippo signaling pathway	0.0254777	0.00739039	4	BMP2,CCND2,ID1,TGFBR2
KEGG Pathway	Endocytosis	0.0199203	0.00783454	5	FGFR2,HLA-B,HLA-C,HLA-E,TGFBR2
KEGG Pathway	Complement and coagulation cascades	0.0352941	0.00834258	3	A2M,C1R,CLU
KEGG Pathway	ECM-receptor interaction	0.0340909	0.00917154	3	COL6A2,THBS1,ITGA10
KEGG Pathway	Parkinson disease	0.018797	0.00991047	5	SLC25A6,NFE2L2,UBB,TUBA1B,SLC39A14
KEGG Pathway	Th1 and Th2 cell differentiation	0.0326087	0.0103492	3	MAF,NFKBIA,MAML2
KEGG Pathway	Prostate cancer	0.0309278	0.0119394	3	ERG,FGFR2,NFKBIA
KEGG Pathway	AGE-RAGE signaling pathway in diabetic complications	0.03	0.0129571	3	ICAM1,TGFBR2,VCAM1
KEGG Pathway	Protein digestion and absorption	0.0291262	0.0140229	3	ATP1B1,COL6A2,COL12A1
KEGG Pathway	NF-kappa B signaling pathway	0.0288462	0.0143889	3	ICAM1,NFKBIA,VCAM1
KEGG Pathway	Focal adhesion	0.0199005	0.0170149	4	CCND2,COL6A2,THBS1,ITGA10
KEGG Pathway	Diabetic cardiomyopathy	0.0197044	0.0175774	4	SLC25A6,GAPDH,PDK4,TGFBR2
KEGG Pathway	Osteoclast differentiation	0.0234375	0.0248052	3	NFKBIA,TGFBR2,SQSTM1
KEGG Pathway	FoxO signaling pathway	0.0229008	0.0263286	3	CCND2,SOD2,TGFBR2
KEGG Pathway	Apoptosis	0.0367647	0.0289768	5	NFKBIA,PMAIP1,TUBA1B,GAPDH,AHNAK2
KEGG Pathway	PI3K-Akt signaling pathway	0.0141243	0.0298782	5	CCND2,COL6A2,FGFR2,THBS1,ITGA10
KEGG Pathway	Salmonella infection	0.0160643	0.0337928	4	GAPDH,NFKBIA,TUBA1B,AHNAK2
KEGG Pathway	Hepatocellular carcinoma	0.0178571	0.0491031	3	GSTM3,NFE2L2,TGFBR2

## Sheet: ProC
Category	Description	enrichment	pvalue	count	Symbols
KEGG Pathway	Protein processing in endoplasmic reticulum	0.0877193	1.55749e-11	15	ATF4,CANX,DDIT3,LMAN1,P4HB,SSR2,UBE2D3,XBP1,HERPUD1,SEC61B,SEC61G,PPP1R15A,ERO1A,SELENOS,ERO1B
KEGG Pathway	Biosynthesis of amino acids	0.173333	1.23455e-08	13	ENO1,ENO2,GAPDH,GOT1,PGAM1,PGK1,SHMT2,TPI1,PHGDH,GPI,LDHA,EIF4EBP1,VEGFA
KEGG Pathway	Protein export	0.26087	2.71992e-08	6	SRP54,SRP72,SRPRA,SPCS2,SEC61B,SEC61G
KEGG Pathway	Carbon metabolism	0.0869565	4.39811e-08	10	ENO1,ENO2,GAPDH,GOT1,GPI,PGAM1,PGK1,SHMT2,TPI1,PHGDH
KEGG Pathway	Glycolysis / Gluconeogenesis	0.119403	8.44253e-08	8	ENO1,ENO2,GAPDH,GPI,LDHA,PGAM1,PGK1,TPI1
KEGG Pathway	Vibrio cholerae infection	0.18	1.80711e-07	9	ACTG1,ATP6V0E1,KDELR1,SEC61B,KDELR2,SEC61G,ERO1A,CANX,TUBB4B
KEGG Pathway	Arginine and proline metabolism	0.176471	2.07991e-07	9	AMD1,CKB,GOT1,ODC1,P4HA1,P4HA2,SAT2,LDHA,PHGDH
KEGG Pathway	Amyotrophic lateral sclerosis	0.0796703	4.44356e-07	29	ACTG1,ATF4,ATP5MC2,DDIT3,RAB1A,SRSF3,VDAC1,XBP1,COX7A2L,TUBB4B,NXT1,NRBF2,CYCS,NDUFA4L2,MAP1LC3B,CSNK2B,EGR1,VDAC2,CREB3,UBC,ACP1,FOS,JUN,VEGFA,GSTO1,GAPDH,PRKAB2,RHEB,ATP6V0E1
KEGG Pathway	Mitophagy - animal	0.166667	2.28303e-06	12	ATF4,BNIP3,BNIP3L,CSNK2B,JUN,UBC,MAP1LC3B,ACTG1,UBE2D3,VDAC1,ARHGEF2,CYCS
KEGG Pathway	Prion disease	0.043956	3.3191e-06	12	ATF4,ATP5MC2,CSNK2B,DDIT3,EGR1,VDAC1,VDAC2,COX7A2L,TUBB4B,CREB3,CYCS,NDUFA4L2
KEGG Pathway	Spliceosome	0.0612245	4.03448e-06	9	HNRNPC,SNU13,PCBP1,SRSF3,TRA2B,BUD31,BCAS2,SYF2,SF3B5
KEGG Pathway	Non-alcoholic fatty liver disease	0.16129	6.21936e-06	25	ATF4,DDIT3,FOS,JUN,PRKAB2,XBP1,COX7A2L,CYCS,NDUFA4L2,EGR1,JUND,NACA,CREB3,FOSB,CANX,VDAC1,VDAC2,LDHA,PGAM1,EIF4EBP1,VEGFA,GSTO1,ERO1A,CEBPB,KRT10
KEGG Pathway	Pathways of neurodegeneration - multiple diseases	0.0315126	1.17407e-05	15	ATF4,ATP5MC2,CSNK2B,DDIT3,RAB1A,UBC,VDAC1,VDAC2,XBP1,COX7A2L,TUBB4B,NRBF2,CYCS,NDUFA4L2,MAP1LC3B
KEGG Pathway	Parkinson disease	0.0413534	1.50997e-05	11	ATF4,ATP5MC2,DDIT3,UBC,VDAC1,VDAC2,XBP1,COX7A2L,TUBB4B,CYCS,NDUFA4L2
KEGG Pathway	Chemical carcinogenesis - reactive oxygen species	0.044843	1.84927e-05	10	ACP1,ATP5MC2,FOS,JUN,VDAC1,VDAC2,VEGFA,COX7A2L,GSTO1,NDUFA4L2
KEGG Pathway	Apoptosis	0.125	1.86547e-05	17	ACTG1,ATF4,GADD45A,DDIT3,FOS,JUN,GADD45B,CYCS,CEBPB,MLF1,PER2,NUPR1,SESN2,JUND,VEGFA,CKS1B,VIM
KEGG Pathway	Alzheimer disease	0.0338542	2.15388e-05	13	ATF4,ATP5MC2,CSNK2B,DDIT3,GAPDH,VDAC1,VDAC2,XBP1,COX7A2L,TUBB4B,NRBF2,CYCS,NDUFA4L2
KEGG Pathway	Ferroptosis	0.121951	2.19494e-05	5	PCBP1,SLC3A2,VDAC2,MAP1LC3B,SAT2
KEGG Pathway	HIF-1 signaling pathway	0.0642202	3.56227e-05	7	EIF4EBP1,ENO1,ENO2,GAPDH,LDHA,PGK1,VEGFA
KEGG Pathway	Longevity regulating pathway	0.11236	9.92396e-05	10	ATF4,EIF4EBP1,PRKAB2,RHEB,CREB3,SESN2,EIF4B,SLC3A2,VEGFA,CYCS
KEGG Pathway	Fluid shear stress and atherosclerosis	0.151079	0.000165381	21	ACTG1,FOS,JUN,VEGFA,ARHGEF2,GSTO1,KLF2,GAPDH,RAB1A,TUBB4B,CYCS,CEBPB,FOSB,JUND,RHOB,UBC,MAP1LC3B,ATP6V0E1,EIF4EBP1,RHEB,CSNK2B
KEGG Pathway	Ubiquitin mediated proteolysis	0.0492958	0.000188685	7	UBC,UBE2B,UBE2D3,UBE2M,RNF7,WWP2,UBE2R2
KEGG Pathway	Aminoacyl-tRNA biosynthesis	0.0757576	0.000221231	5	DARS1,GARS1,SARS1,TARS1,YARS1
KEGG Pathway	Shigellosis	0.0364372	0.000233648	9	ACTG1,BNIP3,JUN,UBC,UBE2D3,VDAC1,ARHGEF2,CYCS,MAP1LC3B
KEGG Pathway	Pathogenic Escherichia coli infection	0.0406091	0.000250867	8	ACTG1,FOS,GAPDH,JUN,RAB1A,ARHGEF2,TUBB4B,CYCS
KEGG Pathway	Parathyroid hormone synthesis, secretion and action	0.0566038	0.000259212	6	ATF4,EGR1,FOS,JUND,NACA,CREB3
KEGG Pathway	Amphetamine addiction	0.0724638	0.000272661	5	ATF4,FOS,FOSB,JUN,CREB3
KEGG Pathway	Human T-cell leukemia virus 1 infection	0.036036	0.000556107	8	ATF4,CANX,EGR1,FOS,JUN,VDAC1,VDAC2,CREB3
KEGG Pathway	Cocaine addiction	0.0816327	0.000725199	4	ATF4,FOSB,JUN,CREB3
KEGG Pathway	Colorectal cancer	0.0581395	0.000753995	5	GADD45A,FOS,JUN,GADD45B,CYCS
KEGG Pathway	FoxO signaling pathway	0.0610687	0.000800156	8	BNIP3,GADD45A,GADD45B,PRKAB2,KLF2,FBXO32,EGR1,MAP1LC3B
KEGG Pathway	Cysteine and methionine metabolism	0.0784314	0.00084436	4	AMD1,GOT1,LDHA,PHGDH
KEGG Pathway	Huntington disease	0.0294118	0.00108712	9	ATP5MC2,VDAC1,VDAC2,COX7A2L,TUBB4B,CREB3,NRBF2,CYCS,NDUFA4L2
KEGG Pathway	IL-17 signaling pathway	0.0531915	0.00112654	5	CEBPB,FOS,FOSB,JUN,JUND
KEGG Pathway	Transcriptional misregulation in cancer	0.0362694	0.00118015	7	CEBPB,GADD45A,DDIT3,MLF1,GADD45B,PER2,NUPR1
KEGG Pathway	Phagosome	0.0394737	0.00171947	6	ACTG1,CANX,ATP6V0E1,TUBB4B,SEC61B,SEC61G
KEGG Pathway	Cellular senescence	0.0705128	0.0019605	11	GADD45A,EIF4EBP1,GADD45B,RHEB,VDAC1,VDAC2,XBP1,NRBF2,CYCS,H2AZ1,CHMP1B
KEGG Pathway	Glucagon signaling pathway	0.046729	0.00200062	5	ATF4,LDHA,PGAM1,PRKAB2,CREB3
KEGG Pathway	Chemical carcinogenesis - receptor activation	0.0330189	0.00201619	7	ATF4,EIF4EBP1,FOS,JUN,VEGFA,GSTO1,CREB3
KEGG Pathway	Lipid and atherosclerosis	0.0325581	0.00218195	7	ATF4,DDIT3,FOS,JUN,XBP1,ERO1A,CYCS
KEGG Pathway	TNF signaling pathway	0.0446429	0.002442	5	ATF4,CEBPB,FOS,JUN,CREB3
KEGG Pathway	p53 signaling pathway	0.0547945	0.00319164	4	GADD45A,GADD45B,CYCS,SESN2
KEGG Pathway	MAPK signaling pathway	0.0272109	0.00327691	8	ATF4,GADD45A,DDIT3,FOS,JUN,JUND,GADD45B,VEGFA
KEGG Pathway	Thermogenesis	0.0301724	0.00332912	7	ACTG1,ATP5MC2,PRKAB2,RHEB,COX7A2L,CREB3,NDUFA4L2
KEGG Pathway	Glycine, serine and threonine metabolism	0.075	0.00441844	3	PGAM1,SHMT2,PHGDH
KEGG Pathway	Relaxin signaling pathway	0.0387597	0.0044752	5	ATF4,FOS,JUN,VEGFA,CREB3
KEGG Pathway	Salmonella infection	0.0281124	0.00488785	7	ACTG1,RHOB,FOS,GAPDH,JUN,TUBB4B,CYCS
KEGG Pathway	Oxidative phosphorylation	0.0373134	0.00525153	5	ATP5MC2,ATP6V0E1,COX7A2L,CYCS,NDUFA4L2
KEGG Pathway	Nucleotide metabolism	0.0588235	0.00549768	5	AK2,CDA,UPP1,ADSS1,GSTO1
KEGG Pathway	Kaposi sarcoma-associated herpesvirus infection	0.0309278	0.00571077	6	FOS,JUN,UBC,VEGFA,CYCS,MAP1LC3B
KEGG Pathway	Estrogen signaling pathway	0.0362319	0.0059377	5	ATF4,FOS,JUN,KRT10,CREB3
KEGG Pathway	Autophagy - animal	0.0425532	0.00649209	6	BNIP3,RAB1A,RHEB,NRBF2,MAP1LC3B,CYCS
KEGG Pathway	Spinocerebellar ataxia	0.034965	0.00688124	5	VDAC1,VDAC2,XBP1,NRBF2,CYCS
KEGG Pathway	Diabetic cardiomyopathy	0.0295567	0.00707832	6	ATP5MC2,GAPDH,VDAC1,VDAC2,COX7A2L,NDUFA4L2
KEGG Pathway	Small cell lung cancer	0.0434783	0.00725459	4	CKS1B,GADD45A,GADD45B,CYCS
KEGG Pathway	Rheumatoid arthritis	0.0430108	0.00753238	4	FOS,JUN,VEGFA,ATP6V0E1
KEGG Pathway	Choline metabolism in cancer	0.0408163	0.0090264	4	EIF4EBP1,FOS,JUN,RHEB
KEGG Pathway	mTOR signaling pathway	0.0320513	0.00981584	5	EIF4B,EIF4EBP1,RHEB,SLC3A2,SESN2
KEGG Pathway	Human cytomegalovirus infection	0.0266667	0.0113963	6	ATF4,EIF4EBP1,RHEB,VEGFA,CREB3,CYCS
KEGG Pathway	Hepatitis B	0.0308642	0.0114227	5	ATF4,FOS,JUN,CREB3,CYCS
KEGG Pathway	Legionellosis	0.0526316	0.0118078	3	BNIP3,RAB1A,CYCS
KEGG Pathway	AMPK signaling pathway	0.0333333	0.0178483	4	EIF4EBP1,PRKAB2,RHEB,CREB3
KEGG Pathway	Osteoclast differentiation	0.03125	0.0220351	4	FOS,FOSB,JUN,JUND
KEGG Pathway	Thyroid hormone synthesis	0.04	0.0244608	3	ATF4,CANX,CREB3
KEGG Pathway	Pancreatic cancer	0.0394737	0.0253144	3	GADD45A,GADD45B,VEGFA
KEGG Pathway	Epstein-Barr virus infection	0.0247525	0.0268241	5	GADD45A,JUN,GADD45B,VIM,CYCS
KEGG Pathway	Measles	0.028777	0.0286974	4	CSNK2B,FOS,JUN,CYCS
KEGG Pathway	Apelin signaling pathway	0.028777	0.0286974	4	EGR1,PRKAB2,KLF2,MAP1LC3B
KEGG Pathway	Drug metabolism - other enzymes	0.0375	0.0288873	3	CDA,UPP1,GSTO1
KEGG Pathway	Breast cancer	0.0272109	0.034217	4	GADD45A,FOS,JUN,GADD45B
KEGG Pathway	PD-L1 expression and PD-1 checkpoint pathway in cancer	0.0337079	0.0378473	3	CSNK2B,FOS,JUN
KEGG Pathway	GnRH signaling pathway	0.0322581	0.0422329	3	ATF4,EGR1,JUN
KEGG Pathway	Necroptosis	0.0251572	0.0435765	4	H2AZ1,VDAC1,VDAC2,CHMP1B

## Sheet: MirC
Category	Description	enrichment	pvalue	count	Symbols
KEGG Pathway	Glycolysis / Gluconeogenesis	0.164179	2.95319e-11	11	ENO1,ENO2,GAPDH,GPI,LDHA,LDHB,PGAM1,PGK1,PKM,TPI1,SHMT2
KEGG Pathway	HIF-1 signaling pathway	0.0917431	3.96599e-09	10	EIF4EBP1,ENO1,ENO2,GAPDH,LDHA,LDHB,PGK1,SLC2A1,VEGFA,EGLN3
KEGG Pathway	Biosynthesis of amino acids	0.106667	4.49448e-08	8	ENO1,ENO2,GAPDH,PGAM1,PGK1,PKM,SHMT2,TPI1
KEGG Pathway	Carbon metabolism	0.0782609	9.70302e-08	9	ENO1,ENO2,GAPDH,GPI,PGAM1,PGK1,PKM,SHMT2,TPI1
KEGG Pathway	Glucagon signaling pathway	0.0841121	7.21364e-07	9	ATF4,LDHA,LDHB,PGAM1,PKM,PRKAB2,PYGL,SLC2A1,SLC16A3
KEGG Pathway	Parkinson disease	0.0827068	2.29168e-06	22	ATF4,ATP5MC2,COX7C,DDIT3,DUSP1,MAOA,VDAC1,COX7A2L,SLC39A14,NDUFA4L2,TUBB,ACTG1,GPX3,DNAH11,CTSD,GAPDH,SLC2A1,CAV1,PRKAB2,VEGFA,GSTO1,ATP6V0E1
KEGG Pathway	Central carbon metabolism in cancer	0.0857143	8.30702e-06	6	LDHA,LDHB,PGAM1,PKM,SLC2A1,SLC16A3
KEGG Pathway	Amyotrophic lateral sclerosis	0.0302198	4.29698e-05	11	ACTG1,ATF4,ATP5MC2,COX7C,DDIT3,GPX3,VDAC1,DNAH11,COX7A2L,NDUFA4L2,TUBB
KEGG Pathway	Diabetic cardiomyopathy	0.0394089	7.90724e-05	8	ATP5MC2,COX7C,CTSD,GAPDH,SLC2A1,VDAC1,COX7A2L,NDUFA4L2
KEGG Pathway	Proteoglycans in cancer	0.0536585	8.46613e-05	11	ACTG1,CAV1,CD44,EIF4B,FN1,SDC4,TIMP3,VEGFA,DUSP1,GSTO1,VEGFB
KEGG Pathway	Prion disease	0.032967	0.00011173	9	ATF4,ATP5MC2,CAV1,COX7C,DDIT3,VDAC1,COX7A2L,NDUFA4L2,TUBB
KEGG Pathway	Alzheimer disease	0.0260417	0.000317469	10	ATF4,ATP5MC2,COX7C,DDIT3,GAPDH,VDAC1,COX7A2L,SLC39A14,NDUFA4L2,TUBB
KEGG Pathway	Fluid shear stress and atherosclerosis	0.0431655	0.000386268	6	ACTG1,CAV1,DUSP1,SDC4,VEGFA,GSTO1
KEGG Pathway	Non-alcoholic fatty liver disease	0.0387097	0.000686969	6	ATF4,COX7C,DDIT3,PRKAB2,COX7A2L,NDUFA4L2
KEGG Pathway	Mineral absorption	0.0666667	0.000747054	4	MT1E,MT1M,MT1X,MT2A
KEGG Pathway	PI3K-Akt signaling pathway	0.0310734	0.000747164	11	ATF4,EFNA1,EIF4B,EIF4EBP1,FN1,VEGFA,VEGFB,OSMR,DDIT4,DDIT3,DUSP1
KEGG Pathway	Chemical carcinogenesis - reactive oxygen species	0.0313901	0.00086374	7	ATP5MC2,COX7C,VDAC1,VEGFA,COX7A2L,GSTO1,NDUFA4L2
KEGG Pathway	Circadian rhythm	0.0967742	0.00120451	3	PRKAB2,BHLHE40,BHLHE41
KEGG Pathway	Huntington disease	0.0261438	0.00122364	8	ATP5MC2,COX7C,GPX3,VDAC1,DNAH11,COX7A2L,NDUFA4L2,TUBB
KEGG Pathway	Mitophagy - animal	0.0555556	0.00147947	4	ATF4,BNIP3,BNIP3L,TOMM7
KEGG Pathway	Pathways of neurodegeneration - multiple diseases	0.0210084	0.00162982	10	ATF4,ATP5MC2,COX7C,DDIT3,GPX3,VDAC1,DNAH11,COX7A2L,NDUFA4L2,TUBB
KEGG Pathway	Starch and sucrose metabolism	0.0833333	0.00186621	3	GBE1,GPI,PYGL
KEGG Pathway	Oxidative phosphorylation	0.0373134	0.0022589	5	ATP5MC2,COX7C,ATP6V0E1,COX7A2L,NDUFA4L2
KEGG Pathway	Glycine, serine and threonine metabolism	0.125	0.0025315	5	MAOA,PGAM1,SHMT2,P4HA1,SAT2
KEGG Pathway	Ferroptosis	0.0731707	0.00271781	3	CP,SLC39A14,SAT2
KEGG Pathway	Nucleotide metabolism	0.0588235	0.00271939	5	AK2,CDA,UPP1,ADSS1,GSTO1
KEGG Pathway	Pyruvate metabolism	0.0638298	0.00401274	3	LDHA,LDHB,PKM
KEGG Pathway	Vibrio cholerae infection	0.06	0.00477882	3	ACTG1,ATP6V0E1,ERO1A
KEGG Pathway	Arginine and proline metabolism	0.0588235	0.00505241	3	MAOA,P4HA1,SAT2
KEGG Pathway	Thermogenesis	0.0258621	0.00520391	6	ACTG1,ATP5MC2,COX7C,PRKAB2,COX7A2L,NDUFA4L2
KEGG Pathway	Protein processing in endoplasmic reticulum	0.0409357	0.00636019	7	ATF4,DDIT3,SSR2,ERO1A,UBXN1,ACTG1,CTSD
KEGG Pathway	Insulin resistance	0.0462963	0.00638079	5	PPP1R3C,PRKAB2,PYGL,SLC2A1,EIF4EBP1
KEGG Pathway	Human papillomavirus infection	0.0241692	0.0076977	8	EIF4EBP1,FN1,HES1,PKM,RFNG,VEGFA,ATP6V0E1,MMP3
KEGG Pathway	Renal cell carcinoma	0.0434783	0.0116303	3	SLC2A1,VEGFA,EGLN3
KEGG Pathway	Focal adhesion	0.0248756	0.0122504	5	ACTG1,CAV1,FN1,VEGFA,VEGFB
KEGG Pathway	Apoptosis	0.0294118	0.0140312	4	ACTG1,ATF4,CTSD,DDIT3
KEGG Pathway	Insulin signaling pathway	0.0291971	0.0143784	4	EIF4EBP1,PPP1R3C,PRKAB2,PYGL
KEGG Pathway	Chemical carcinogenesis - receptor activation	0.0283019	0.015113	6	ATF4,EIF4EBP1,VEGFA,AIP,GSTO1,PRKAB2
KEGG Pathway	MAPK signaling pathway	0.0204082	0.0155321	6	ATF4,DDIT3,DUSP1,EFNA1,VEGFA,VEGFB
KEGG Pathway	Bacterial invasion of epithelial cells	0.038961	0.0156114	3	ACTG1,CAV1,FN1
KEGG Pathway	Autophagy - animal	0.0283688	0.0158215	4	BNIP3,CTSD,IGBP1,DDIT4
KEGG Pathway	RNA degradation	0.0379747	0.0167119	3	ENO1,ENO2,ZCCHC7
KEGG Pathway	Drug metabolism - other enzymes	0.0375	0.017278	3	CDA,UPP1,GSTO1
KEGG Pathway	ECM-receptor interaction	0.0340909	0.0221905	3	CD44,FN1,SDC4
KEGG Pathway	Longevity regulating pathway	0.0337079	0.0228526	3	ATF4,EIF4EBP1,PRKAB2
KEGG Pathway	Rheumatoid arthritis	0.0322581	0.0256076	3	MMP3,VEGFA,ATP6V0E1
KEGG Pathway	AGE-RAGE signaling pathway in diabetic complications	0.03	0.0308386	3	FN1,VEGFA,VEGFB

## Sheet: SpC
Category	Description	enrichment	pvalue	count	Symbols
KEGG Pathway	Focal adhesion	0.154229	2.84074e-14	31	ACTN1,COL2A1,COL6A1,COL6A2,COL9A2,COL9A3,COMP,CRK,FLNA,FN1,ITGA5,LAMB2,PRKCA,RAF1,SOS2,THBS1,TLN1,VEGFA,PIK3R3,ITGA10,AKT3,ATM,CHD4,DLG1,EP300,MDM2,MAML2,CD44,FGFR1,FOXO3,PKN2
KEGG Pathway	Human papillomavirus infection	0.0664653	6.18733e-11	22	ATM,CHD4,COL2A1,COL6A1,COL6A2,COL9A2,COL9A3,COMP,DLG1,EP300,FN1,ITGA5,LAMB2,MDM2,RAF1,SOS2,THBS1,VEGFA,PIK3R3,ITGA10,AKT3,MAML2
KEGG Pathway	ECM-receptor interaction	0.136364	4.54224e-10	12	CD44,COL2A1,COL6A1,COL6A2,COL9A2,COL9A3,COMP,FN1,ITGA5,LAMB2,THBS1,ITGA10
KEGG Pathway	PI3K-Akt signaling pathway	0.059322	1.33744e-09	21	COL2A1,COL6A1,COL6A2,COL9A2,COL9A3,COMP,FGFR1,FOXO3,FN1,ITGA5,LAMB2,MDM2,PRKCA,PKN2,RAF1,SOS2,THBS1,VEGFA,PIK3R3,ITGA10,AKT3
KEGG Pathway	Proteoglycans in cancer	0.239024	1.99832e-08	49	CD44,FGFR1,FLNA,FN1,ITGA5,ITPR2,MDM2,PRKCA,RAF1,SOS2,STAT3,THBS1,VEGFA,PIK3R3,AKT3,CRK,EP300,GNAI3,IRS2,ATM,PLK3,FOXO3,NFATC1,PPP3CA,CYLD,RUNX1,ZBTB16,MMP3,AFDN,TLN1,TF,TFRC,DLG1,KIDINS220,CLIP1,SLC3A2,FNIP1,LAMB2,LDLR,ATF6,GLS,INHBA,RIF1,SMARCC2,ARID1B,RB1CC1,CPEB4,ACSL3,GFPT1
KEGG Pathway	MicroRNAs in cancer	0.0580645	2.84491e-08	18	ATM,CD44,CRK,EP300,GLS,ITGA5,MDM2,MDM4,PRKCA,RAF1,SOS2,SOX4,STAT3,THBS1,VEGFA,PIK3R3,IRS2,FOXP1
KEGG Pathway	Protein digestion and absorption	0.106796	3.34278e-08	11	ATP1A1,COL2A1,COL6A1,COL6A2,COL9A2,COL9A3,COL11A1,COL11A2,SLC3A2,SLC38A2,COL27A1
KEGG Pathway	Growth hormone synthesis, secretion and action	0.092437	1.49854e-07	11	CRK,EP300,GNAI3,ITPR2,PRKCA,RAF1,SOS2,STAT3,PIK3R3,IRS2,AKT3
KEGG Pathway	FoxO signaling pathway	0.0839695	3.98563e-07	11	ATM,PLK3,EP300,FOXO3,MDM2,RAF1,SOS2,STAT3,PIK3R3,IRS2,AKT3
KEGG Pathway	Human cytomegalovirus infection	0.0577778	2.57282e-06	13	CRK,GNAI3,ITPR2,MDM2,NFATC1,PPP3CA,PRKCA,RAF1,SOS2,STAT3,VEGFA,PIK3R3,AKT3
KEGG Pathway	C-type lectin receptor signaling pathway	0.0865385	3.55819e-06	9	PLK3,CYLD,ITPR2,MDM2,NFATC1,PPP3CA,RAF1,PIK3R3,AKT3
KEGG Pathway	EGFR tyrosine kinase inhibitor resistance	0.101266	3.8339e-06	8	FOXO3,PRKCA,RAF1,SOS2,STAT3,VEGFA,PIK3R3,AKT3
KEGG Pathway	Thyroid hormone signaling pathway	0.14876	1.23158e-05	18	ATP1A1,EP300,MDM2,PRKCA,RAF1,PIK3R3,MED13,AKT3,MED13L,ATP2B1,GNAI3,ITPR2,NFATC1,PPP3CA,IRS2,AFDN,LDLR,TF
KEGG Pathway	Acute myeloid leukemia	0.104478	1.26698e-05	7	RUNX1,RAF1,SOS2,STAT3,ZBTB16,PIK3R3,AKT3
KEGG Pathway	Renal cell carcinoma	0.101449	1.541e-05	7	CRK,EP300,RAF1,SOS2,VEGFA,PIK3R3,AKT3
KEGG Pathway	Prostate cancer	0.0824742	1.77286e-05	8	EP300,FGFR1,MDM2,MMP3,RAF1,SOS2,PIK3R3,AKT3
KEGG Pathway	Non-small cell lung cancer	0.0972222	2.04247e-05	7	FOXO3,PRKCA,RAF1,SOS2,STAT3,PIK3R3,AKT3
KEGG Pathway	Chronic myeloid leukemia	0.0921053	2.91351e-05	7	RUNX1,CRK,MDM2,RAF1,SOS2,PIK3R3,AKT3
KEGG Pathway	Shigellosis	0.0728745	3.51446e-05	18	ACTN1,ATM,CD44,CRK,FOXO3,ITGA5,ITPR2,MDM2,TLN1,PIK3R3,ARHGEF2,AKT3,REV3L,CHD4,DLG1,EP300,STAT3,NCOR2
KEGG Pathway	Rap1 signaling pathway	0.052381	3.75473e-05	11	CRK,FGFR1,GNAI3,AFDN,PRKCA,RAF1,THBS1,TLN1,VEGFA,PIK3R3,AKT3
KEGG Pathway	HIF-1 signaling pathway	0.0733945	4.13261e-05	8	EP300,PRKCA,STAT3,TF,TFRC,VEGFA,PIK3R3,AKT3
KEGG Pathway	Regulation of actin cytoskeleton	0.0733945	5.27172e-05	16	ACTN1,CRK,FGFR1,FN1,ITGA5,RAF1,SOS2,PIK3R3,ITGA10,ABI2,NCKAP1,NFATC1,PKN2,AKT3,LAMB2,PRKCA
KEGG Pathway	VEGF signaling pathway	0.101695	6.23732e-05	6	PPP3CA,PRKCA,RAF1,VEGFA,PIK3R3,AKT3
KEGG Pathway	Cellular senescence	0.0576923	9.12392e-05	9	ATM,FOXO3,ITPR2,MDM2,NFATC1,PPP3CA,RAF1,PIK3R3,AKT3
KEGG Pathway	Ferroptosis	0.121951	0.000108124	5	CP,ACSL3,SLC3A2,TF,TFRC
KEGG Pathway	cGMP-PKG signaling pathway	0.0538922	0.000153177	9	ATP1A1,ATP2B1,GNAI3,ITPR2,NFATC1,PPP3CA,RAF1,IRS2,AKT3
KEGG Pathway	Prolactin signaling pathway	0.0857143	0.000163124	6	FOXO3,RAF1,SOS2,STAT3,PIK3R3,AKT3
KEGG Pathway	AGE-RAGE signaling pathway in diabetic complications	0.07	0.000168314	7	FN1,NFATC1,PRKCA,STAT3,VEGFA,PIK3R3,AKT3
KEGG Pathway	Human immunodeficiency virus 1 infection	0.0471698	0.000198766	10	ATM,CRK,GNAI3,ITPR2,NFATC1,PPP3CA,PRKCA,RAF1,PIK3R3,AKT3
KEGG Pathway	T cell receptor signaling pathway	0.0673077	0.000214735	7	DLG1,NFATC1,PPP3CA,RAF1,SOS2,PIK3R3,AKT3
KEGG Pathway	Glioma	0.08	0.000238667	6	MDM2,PRKCA,RAF1,SOS2,PIK3R3,AKT3
KEGG Pathway	Spinocerebellar ataxia	0.125874	0.000275219	18	ITPR2,PRKCA,ATXN2,PIK3R3,PUM1,RB1CC1,AKT3,NOP56,APP,FUS,HIP1,PPP3CA,RAF1,VCP,DNAH11,ATF6,LRP1,IRS2
KEGG Pathway	Spliceosome	0.0544218	0.000331603	8	FUS,HNRNPU,TRA2B,DDX46,SRSF10,SNRNP200,TRA2A,PRPF38B
KEGG Pathway	B cell receptor signaling pathway	0.0731707	0.000387853	6	NFATC1,PPP3CA,RAF1,SOS2,PIK3R3,AKT3
KEGG Pathway	Transcriptional misregulation in cancer	0.0466321	0.000446879	9	ATM,RUNX1,EWSR1,FUS,MDM2,KMT2A,AFF1,MMP3,ZBTB16
KEGG Pathway	Kaposi sarcoma-associated herpesvirus infection	0.0463918	0.000463935	9	EP300,ITPR2,NFATC1,PPP3CA,RAF1,STAT3,VEGFA,PIK3R3,AKT3
KEGG Pathway	ErbB signaling pathway	0.0705882	0.000470581	6	CRK,PRKCA,RAF1,SOS2,PIK3R3,AKT3
KEGG Pathway	Neurotrophin signaling pathway	0.0588235	0.000488557	7	CRK,FOXO3,RAF1,SOS2,PIK3R3,AKT3,KIDINS220
KEGG Pathway	mTOR signaling pathway	0.0512821	0.000493297	8	PRKCA,RAF1,CLIP1,SLC3A2,SOS2,PIK3R3,AKT3,FNIP1
KEGG Pathway	Pathways in cancer	0.0301318	0.000530541	16	RUNX1,CRK,EP300,FGFR1,FN1,GNAI3,LAMB2,MDM2,PRKCA,RAF1,SOS2,STAT3,VEGFA,ZBTB16,PIK3R3,AKT3
KEGG Pathway	Endometrial cancer	0.0862069	0.000562919	5	FOXO3,RAF1,SOS2,PIK3R3,AKT3
KEGG Pathway	PD-L1 expression and PD-1 checkpoint pathway in cancer	0.0674157	0.000601556	6	NFATC1,PPP3CA,RAF1,STAT3,PIK3R3,AKT3
KEGG Pathway	Hepatitis B	0.0493827	0.000632854	8	EP300,NFATC1,PRKCA,RAF1,SOS2,STAT3,PIK3R3,AKT3
KEGG Pathway	Relaxin signaling pathway	0.0542636	0.000790201	7	GNAI3,PRKCA,RAF1,SOS2,VEGFA,PIK3R3,AKT3
KEGG Pathway	Lysine degradation	0.0793651	0.000823737	5	KMT2A,PLOD2,NSD3,ASH1L,KMT2C
KEGG Pathway	GnRH secretion	0.078125	0.000885166	5	ITPR2,PRKCA,RAF1,PIK3R3,AKT3
KEGG Pathway	Lipid and atherosclerosis	0.0418605	0.000965581	9	LDLR,MMP3,NFATC1,PPP3CA,PRKCA,STAT3,PIK3R3,AKT3,ATF6
KEGG Pathway	Long-term potentiation	0.238806	0.00108998	16	EP300,ITPR2,PPP3CA,PRKCA,RAF1,FGFR1,GNAI3,MAFB,GLS,SLC38A2,SOS2,NFATC1,APP,AKT3,PIK3R3,SEMA3E
KEGG Pathway	Yersinia infection	0.0510949	0.00112426	7	CRK,FN1,ITGA5,NFATC1,PKN2,PIK3R3,AKT3
KEGG Pathway	Fc epsilon RI signaling pathway	0.0735294	0.00116546	5	PRKCA,RAF1,SOS2,PIK3R3,AKT3
KEGG Pathway	cAMP signaling pathway	0.040724	0.00117031	9	ATP1A1,ATP2B1,EP300,GNAI3,AFDN,NFATC1,RAF1,PIK3R3,AKT3
KEGG Pathway	Bladder cancer	0.097561	0.00128071	4	MDM2,RAF1,THBS1,VEGFA
KEGG Pathway	Central carbon metabolism in cancer	0.0714286	0.00132795	5	FGFR1,GLS,RAF1,PIK3R3,AKT3
KEGG Pathway	Signaling pathways regulating pluripotency of stem cells	0.048951	0.00144062	7	FGFR1,INHBA,RAF1,STAT3,PIK3R3,AKT3,RIF1
KEGG Pathway	Parathyroid hormone synthesis, secretion and action	0.0566038	0.00149905	6	FGFR1,GNAI3,ITPR2,PRKCA,RAF1,MAFB
KEGG Pathway	Melanoma	0.0694444	0.00150657	5	FGFR1,MDM2,RAF1,PIK3R3,AKT3
KEGG Pathway	Platinum drug resistance	0.0684932	0.00160222	5	ATM,MDM2,REV3L,PIK3R3,AKT3
KEGG Pathway	Chemokine signaling pathway	0.0416667	0.00188127	8	CRK,FOXO3,GNAI3,RAF1,SOS2,STAT3,PIK3R3,AKT3
KEGG Pathway	Pancreatic cancer	0.0657895	0.00191596	5	RAF1,STAT3,VEGFA,PIK3R3,AKT3
KEGG Pathway	Glutamatergic synapse	0.0526316	0.00217009	6	GLS,GNAI3,ITPR2,PPP3CA,PRKCA,SLC38A2
KEGG Pathway	MAPK signaling pathway	0.0340136	0.00242698	10	CRK,FGFR1,FLNA,NFATC1,PPP3CA,PRKCA,RAF1,SOS2,VEGFA,AKT3
KEGG Pathway	Chemical carcinogenesis - receptor activation	0.0377358	0.00345965	8	GNAI3,PRKCA,RAF1,SOS2,STAT3,VEGFA,PIK3R3,AKT3
KEGG Pathway	Hepatocellular carcinoma	0.0416667	0.00356568	7	PRKCA,RAF1,SMARCC2,SOS2,PIK3R3,AKT3,ARID1B
KEGG Pathway	Gap junction	0.0568182	0.00363071	5	GNAI3,ITPR2,PRKCA,RAF1,SOS2
KEGG Pathway	Longevity regulating pathway	0.0561798	0.00381102	5	FOXO3,PIK3R3,IRS2,RB1CC1,AKT3
KEGG Pathway	Regulation of lipolysis in adipocytes	0.0714286	0.00405491	4	GNAI3,PIK3R3,IRS2,AKT3
KEGG Pathway	Natural killer cell mediated cytotoxicity	0.0458015	0.00432084	6	NFATC1,PPP3CA,PRKCA,RAF1,SOS2,PIK3R3
KEGG Pathway	Human T-cell leukemia virus 1 infection	0.036036	0.0045604	8	ATM,DLG1,EP300,NFATC1,PPP3CA,TLN1,PIK3R3,AKT3
KEGG Pathway	Notch signaling pathway	0.135593	0.00489043	8	EP300,TLE4,NCOR2,MAML2,NFATC1,PPP3CA,PRKCA,DAAM1
KEGG Pathway	Long-term depression	0.0666667	0.00519271	4	GNAI3,ITPR2,PRKCA,RAF1
KEGG Pathway	Insulin signaling pathway	0.0437956	0.00536536	6	CRK,RAF1,SOS2,PIK3R3,IRS2,AKT3
KEGG Pathway	Fc gamma R-mediated phagocytosis	0.0515464	0.00549114	5	CRK,PRKCA,RAF1,PIK3R3,AKT3
KEGG Pathway	Estrogen signaling pathway	0.0434783	0.00555594	6	GNAI3,ITPR2,RAF1,SOS2,PIK3R3,AKT3
KEGG Pathway	Endocrine resistance	0.0510204	0.00573265	5	MDM2,RAF1,SOS2,PIK3R3,AKT3
KEGG Pathway	Choline metabolism in cancer	0.0510204	0.00573265	5	PRKCA,RAF1,SOS2,PIK3R3,AKT3
KEGG Pathway	Aldosterone synthesis and secretion	0.0510204	0.00573265	5	ATP1A1,ATP2B1,ITPR2,LDLR,PRKCA
KEGG Pathway	Longevity regulating pathway - multiple species	0.0645161	0.00583427	4	FOXO3,PIK3R3,IRS2,AKT3
KEGG Pathway	Ras signaling pathway	0.0344828	0.00591229	8	FGFR1,AFDN,PRKCA,RAF1,SOS2,VEGFA,PIK3R3,AKT3
KEGG Pathway	Progesterone-mediated oocyte maturation	0.0490196	0.00677376	5	GNAI3,RAF1,PIK3R3,AKT3,CPEB4
KEGG Pathway	Amoebiasis	0.0490196	0.00677376	5	ACTN1,FN1,LAMB2,PRKCA,PIK3R3
KEGG Pathway	Adipocytokine signaling pathway	0.057971	0.00848981	4	ACSL3,STAT3,IRS2,AKT3
KEGG Pathway	Insulin resistance	0.0462963	0.00857312	5	GFPT1,STAT3,PIK3R3,IRS2,AKT3
KEGG Pathway	Aldosterone-regulated sodium reabsorption	0.0810811	0.00896151	3	ATP1A1,PRKCA,PIK3R3
KEGG Pathway	Oxytocin signaling pathway	0.038961	0.00932015	6	GNAI3,ITPR2,NFATC1,PPP3CA,PRKCA,RAF1
KEGG Pathway	Adherens junction	0.140845	0.00937214	10	ACTN1,EP300,FGFR1,AFDN,GNAI3,PRKCA,PIK3R3,RUNX1,DLG1,ARHGEF2
KEGG Pathway	Toxoplasmosis	0.0714286	0.00994146	8	GNAI3,LAMB2,LDLR,STAT3,AKT3,ITPR2,KMT2A,USP8
KEGG Pathway	Viral carcinogenesis	0.0343137	0.0100109	7	ACTN1,CHD4,DLG1,EP300,MDM2,STAT3,PIK3R3
KEGG Pathway	Pathways of neurodegeneration - multiple diseases	0.0252101	0.0101697	12	APP,FUS,HIP1,ITPR2,PPP3CA,PRKCA,RAF1,ATXN2,VCP,DNAH11,RB1CC1,ATF6
KEGG Pathway	Hepatitis C	0.0382166	0.0101892	6	LDLR,RAF1,SOS2,STAT3,PIK3R3,AKT3
KEGG Pathway	Cholinergic synapse	0.0442478	0.0103056	5	GNAI3,ITPR2,PRKCA,PIK3R3,AKT3
KEGG Pathway	p53 signaling pathway	0.0547945	0.0103121	4	ATM,MDM2,MDM4,THBS1
KEGG Pathway	Leukocyte transendothelial migration	0.0438596	0.0106788	5	ACTN1,GNAI3,AFDN,PRKCA,PIK3R3
KEGG Pathway	Serotonergic synapse	0.0434783	0.0110611	5	APP,GNAI3,ITPR2,PRKCA,RAF1
KEGG Pathway	JAK-STAT signaling pathway	0.037037	0.011763	6	EP300,RAF1,SOS2,STAT3,PIK3R3,AKT3
KEGG Pathway	Gastric acid secretion	0.0526316	0.0118329	4	ATP1A1,GNAI3,ITPR2,PRKCA
KEGG Pathway	Bacterial invasion of epithelial cells	0.0519481	0.01237	4	CRK,FN1,ITGA5,PIK3R3
KEGG Pathway	Sphingolipid signaling pathway	0.0420168	0.0126837	5	GNAI3,PRKCA,RAF1,PIK3R3,AKT3
KEGG Pathway	Wnt signaling pathway	0.0359281	0.013501	6	EP300,NFATC1,PPP3CA,PRKCA,TLE4,DAAM1
KEGG Pathway	Alzheimer disease	0.0260417	0.0147784	10	APP,ITPR2,LRP1,PPP3CA,RAF1,PIK3R3,IRS2,RB1CC1,AKT3,ATF6
KEGG Pathway	Platelet activation	0.0403226	0.0149291	5	GNAI3,ITPR2,TLN1,PIK3R3,AKT3
KEGG Pathway	Protein processing in endoplasmic reticulum	0.0350877	0.0150148	6	RRBP1,VCP,MBTPS1,SEC24D,ATF6,ERO1B
KEGG Pathway	Cell cycle	0.0396825	0.0158972	5	ATM,CDKN1C,EP300,MDM2,STAG1
KEGG Pathway	Osteoclast differentiation	0.0390625	0.0169062	5	CYLD,NFATC1,PPP3CA,PIK3R3,AKT3
KEGG Pathway	Carbohydrate digestion and absorption	0.0638298	0.0171838	3	ATP1A1,PIK3R3,AKT3
KEGG Pathway	Colorectal cancer	0.0465116	0.0179117	4	RAF1,SOS2,PIK3R3,AKT3
KEGG Pathway	Dopaminergic synapse	0.0378788	0.0190496	5	GNAI3,ITPR2,PPP3CA,PRKCA,AKT3
KEGG Pathway	Axon guidance	0.032967	0.0197767	6	GNAI3,PPP3CA,PRKCA,RAF1,PIK3R3,SEMA3E
KEGG Pathway	GABAergic synapse	0.0449438	0.0200515	4	GLS,GNAI3,PRKCA,SLC38A2
KEGG Pathway	Malaria	0.12	0.0202524	6	COMP,LRP1,THBS1,DYNC1H1,ITGA5,TFRC
KEGG Pathway	Apoptosis	0.0367647	0.0213645	5	ATM,ITPR2,RAF1,PIK3R3,AKT3
KEGG Pathway	Salivary secretion	0.0434783	0.0223422	4	ATP1A1,ATP2B1,ITPR2,PRKCA
KEGG Pathway	Small cell lung cancer	0.0434783	0.0223422	4	FN1,LAMB2,PIK3R3,AKT3
KEGG Pathway	GnRH signaling pathway	0.0430108	0.0231398	4	ITPR2,PRKCA,RAF1,SOS2
KEGG Pathway	Endocrine and other factor-regulated calcium reabsorption	0.0566038	0.0236024	3	ATP1A1,ATP2B1,PRKCA
KEGG Pathway	TGF-beta signaling pathway	0.0425532	0.0239545	4	EP300,INHBA,THBS1,ZFYVE16
KEGG Pathway	Autophagy - animal	0.035461	0.0245058	5	RAF1,PIK3R3,IRS2,RB1CC1,AKT3
KEGG Pathway	Breast cancer	0.0340136	0.0286493	5	FGFR1,RAF1,SOS2,PIK3R3,AKT3
KEGG Pathway	Phospholipase D signaling pathway	0.0337838	0.0293803	5	PRKCA,RAF1,SOS2,PIK3R3,AKT3
KEGG Pathway	Melanogenesis	0.039604	0.0301418	4	EP300,GNAI3,PRKCA,RAF1
KEGG Pathway	Adrenergic signaling in cardiomyocytes	0.0333333	0.0308773	5	ATP1A1,ATP2B1,GNAI3,PRKCA,AKT3
KEGG Pathway	Epstein-Barr virus infection	0.029703	0.0308797	6	CD44,MDM2,STAT3,PIK3R3,NCOR2,AKT3
KEGG Pathway	Pancreatic secretion	0.0392157	0.0310956	4	ATP1A1,ATP2B1,ITPR2,PRKCA
KEGG Pathway	Phagosome	0.0328947	0.0324215	5	COMP,DYNC1H1,ITGA5,TFRC,THBS1
KEGG Pathway	Mineral absorption	0.05	0.0325118	3	ATP1A1,ATP2B1,TF
KEGG Pathway	Cushing syndrome	0.0322581	0.0348266	5	GNAI3,ITPR2,LDLR,KMT2A,USP8
KEGG Pathway	Glucagon signaling pathway	0.0373832	0.0361293	4	EP300,ITPR2,PPP3CA,AKT3
KEGG Pathway	Renin secretion	0.0434783	0.0461773	3	GNAI3,ITPR2,PPP3CA
KEGG Pathway	Chemical carcinogenesis - reactive oxygen species	0.0269058	0.0462508	6	FOXO3,RAF1,SOS2,VEGFA,PIK3R3,AKT3
KEGG Pathway	Tight junction	0.0295858	0.0474865	5	ACTN1,RUNX1,DLG1,AFDN,ARHGEF2
KEGG Pathway	Influenza A	0.0292398	0.0494903	5	EP300,PRKCA,RAF1,PIK3R3,AKT3

## Sheet: HomC
Category	Description	enrichment	pvalue	count	Symbols
KEGG Pathway	TNF signaling pathway	0.267857	2.26568e-10	30	BIRC2,BIRC3,BCL3,MAP3K8,ICAM1,IRF1,JUNB,MMP3,NFKB1,NFKBIA,MAP2K6,BCL2,CD14,CYLD,GADD45B,NFKB2,CTSK,LMNA,TUBA1A,CDKN1A,TUBB2A,RIPK2,LDLR,GBP2,IFI16,FTH1,SQSTM1,B2M,TAPBP,ZNF267
KEGG Pathway	Osteoclast differentiation	0.296875	9.58759e-10	38	CTSK,CYLD,JUNB,NFATC2,NFKB1,NFKB2,NFKBIA,TNFRSF11B,MAP2K6,TGFBR2,SQSTM1,CDKN1A,RCAN1,FGF2,HIF1A,ICAM1,UBB,ZFP36,B2M,ETS1,FDPS,ZFP36L1,GADD45B,BCL2,TAPBP,BCL3,IRF1,MAP3K8,TUBB2A,EZR,TUBA1A,ACSL3,REL,PDE4B,SOX9,SSTR2,LDLR,MMP3
KEGG Pathway	NF-kappa B signaling pathway	0.0961538	1.87686e-09	10	BIRC2,BIRC3,BCL2,CD14,CYLD,ICAM1,GADD45B,NFKB1,NFKB2,NFKBIA
KEGG Pathway	Transcriptional misregulation in cancer	0.103627	6.6798e-09	20	BIRC2,BIRC3,CD14,CDKN1A,DDX5,ID2,MMP3,GADD45B,NFKB1,REL,TGFBR2,NFKBIZ,NFKBIA,BCL2,FGF2,HMOX1,NFE2L2,BMP2,SOD2,NFKB2
KEGG Pathway	Kaposi sarcoma-associated herpesvirus infection	0.056701	7.42923e-08	11	CDKN1A,RCAN1,FGF2,HIF1A,ICAM1,NFATC2,NFKB1,NFKBIA,MAP2K6,UBB,ZFP36
KEGG Pathway	Lipid and atherosclerosis	0.0883721	2.10049e-07	19	BCL2,CD14,ICAM1,LDLR,MMP3,NFATC2,NFE2L2,NFKB1,NFKBIA,MAP2K6,SOD2,HMOX1,SDC2,SQSTM1,HNRNPA2B1,TUBB2A,TUBA1A,HNRNPA3,UBB
KEGG Pathway	TGF-beta signaling pathway	0.138298	2.11749e-07	13	BMP2,DCN,ID1,ID2,ID3,INHBA,TGFBR2,BAMBI,BIRC2,BIRC3,SAV1,FGF2,KLF4
KEGG Pathway	Human T-cell leukemia virus 1 infection	0.0495495	2.89497e-07	11	B2M,CDKN1A,ETS1,FDPS,ICAM1,NFATC2,NFKB1,NFKB2,NFKBIA,TGFBR2,ZFP36
KEGG Pathway	Apoptosis	0.0661765	3.18143e-07	9	BIRC2,BIRC3,BCL2,CTSK,LMNA,GADD45B,NFKB1,NFKBIA,TUBA1A
KEGG Pathway	Pathways in cancer	0.0338983	5.41538e-07	18	BIRC2,BIRC3,BCL2,BMP2,CDKN1A,ETS1,FGF2,HIF1A,HMOX1,GADD45B,NFE2L2,NFKB1,NFKB2,NFKBIA,NKX3-1,TGFBR2,CYP1B1,SOD2
KEGG Pathway	Cellular senescence	0.0576923	1.01183e-06	9	ZFP36L1,CDKN1A,ETS1,GADD45B,NFATC2,NFKB1,MAP2K6,TGFBR2,SQSTM1
KEGG Pathway	Epstein-Barr virus infection	0.049505	1.02333e-06	10	B2M,BCL2,CDKN1A,ICAM1,GADD45B,NFKB1,NFKB2,NFKBIA,MAP2K6,TAPBP
KEGG Pathway	Small cell lung cancer	0.076087	2.64954e-06	7	BIRC2,BIRC3,BCL2,CDKN1A,GADD45B,NFKB1,NFKBIA
KEGG Pathway	Fluid shear stress and atherosclerosis	0.057554	4.15994e-06	8	BCL2,HMOX1,ICAM1,NFE2L2,NFKB1,MAP2K6,SDC2,SQSTM1
KEGG Pathway	C-type lectin receptor signaling pathway	0.0673077	6.01103e-06	7	BCL3,CYLD,IRF1,NFATC2,NFKB1,NFKB2,NFKBIA
KEGG Pathway	Salmonella infection	0.0401606	6.62747e-06	10	BIRC2,BIRC3,BCL2,CD14,NFKB1,NFKBIA,MAP2K6,TUBB2A,TUBA1A,RIPK2
KEGG Pathway	Proteoglycans in cancer	0.0439024	9.49105e-06	9	CDKN1A,DCN,DDX5,FGF2,HIF1A,LUM,MSN,SDC2,EZR
KEGG Pathway	Toxoplasmosis	0.0625	9.80636e-06	7	BIRC2,BIRC3,BCL2,LDLR,NFKB1,NFKBIA,MAP2K6
KEGG Pathway	NOD-like receptor signaling pathway	0.0434783	3.20764e-05	8	BIRC2,BIRC3,BCL2,GBP2,IFI16,NFKB1,NFKBIA,RIPK2
KEGG Pathway	Legionellosis	0.280702	3.74623e-05	16	CD14,CLK1,NFKB1,NFKB2,NFKBIA,MAP3K8,CTSK,MAP2K6,SERPING1,C1S,IRF1,FGF2,GADD45B,TGFBR2,SCD,PRDX1
KEGG Pathway	Prostate cancer	0.226804	4.56035e-05	22	BCL2,CDKN1A,MMP3,NFKB1,NFKBIA,NKX3-1,CD14,UBB,RIPK2,SQSTM1,TIFA,HIF1A,HMOX1,BEX3,ICAM1,TGFBR2,CYP1B1,FGF2,KLF4,MSN,EZR,PDE4B
KEGG Pathway	Toll-like receptor signaling pathway	0.0576923	6.74066e-05	6	CD14,MAP3K8,CTSK,NFKB1,NFKBIA,MAP2K6
KEGG Pathway	Hippo signaling pathway	0.044586	8.59577e-05	7	BIRC2,BIRC3,BMP2,ID1,ID2,TGFBR2,SAV1
KEGG Pathway	Hepatitis B	0.0432099	0.000104579	7	BCL2,CDKN1A,NFATC2,NFKB1,NFKBIA,MAP2K6,TGFBR2
KEGG Pathway	Chronic myeloid leukemia	0.0657895	0.000149388	5	CDKN1A,GADD45B,NFKB1,NFKBIA,TGFBR2
KEGG Pathway	Pertussis	0.0657895	0.000149388	5	SERPING1,C1S,CD14,IRF1,NFKB1
KEGG Pathway	Shigellosis	0.0323887	0.000247605	8	BCL2,CD14,NFKB1,NFKBIA,UBB,RIPK2,SQSTM1,TIFA
KEGG Pathway	PD-L1 expression and PD-1 checkpoint pathway in cancer	0.0561798	0.000313229	5	HIF1A,NFATC2,NFKB1,NFKBIA,MAP2K6
KEGG Pathway	Signaling pathways regulating pluripotency of stem cells	0.041958	0.000383802	6	FGF2,ID1,ID2,ID3,INHBA,KLF4
KEGG Pathway	Focal adhesion	0.0597015	0.00039176	12	BIRC2,BIRC3,BCL2,CHAD,COL2A1,COL9A3,COMP,CDKN1A,FGF2,NFKB1,IRF1,COL27A1
KEGG Pathway	Terpenoid backbone biosynthesis	0.136364	0.00039578	3	FDPS,HMGCS1,IDI1
KEGG Pathway	Human immunodeficiency virus 1 infection	0.0330189	0.000538416	7	B2M,BCL2,NFATC2,NFKB1,NFKBIA,MAP2K6,TAPBP
KEGG Pathway	Mineral absorption	0.0833333	0.000668655	5	FTH1,HMOX1,MT1F,MT1G,ACSL3
KEGG Pathway	Necroptosis	0.0377358	0.000672241	6	BIRC2,BIRC3,BCL2,CYLD,FTH1,SQSTM1
KEGG Pathway	Chemical carcinogenesis - reactive oxygen species	0.0313901	0.000725779	7	CYP1B1,HIF1A,HMOX1,NFE2L2,NFKB1,NFKBIA,SOD2
KEGG Pathway	Th17 cell differentiation	0.0462963	0.000760576	5	HIF1A,NFATC2,NFKB1,NFKBIA,TGFBR2
KEGG Pathway	Human cytomegalovirus infection	0.0311111	0.000764797	7	B2M,CDKN1A,NFATC2,NFKB1,NFKBIA,MAP2K6,TAPBP
KEGG Pathway	MAPK signaling pathway	0.0272109	0.000782398	8	CD14,MAP3K8,FGF2,GADD45B,NFKB1,NFKB2,MAP2K6,TGFBR2
KEGG Pathway	HIF-1 signaling pathway	0.0458716	0.000792933	5	BCL2,CDKN1A,HIF1A,HMOX1,NFKB1
KEGG Pathway	Neurotrophin signaling pathway	0.0420168	0.00117573	5	BCL2,NFKB1,NFKBIA,RIPK2,BEX3
KEGG Pathway	Apoptosis - multiple species	0.09375	0.00121443	3	BIRC2,BIRC3,BCL2
KEGG Pathway	Platinum drug resistance	0.0547945	0.00139644	4	BIRC2,BIRC3,BCL2,CDKN1A
KEGG Pathway	PPAR signaling pathway	0.0666667	0.00154355	5	DBI,ACSL3,HMGCS1,SCD,FADS1
KEGG Pathway	Pancreatic cancer	0.0526316	0.001621	4	CDKN1A,GADD45B,NFKB1,TGFBR2
KEGG Pathway	Complement and coagulation cascades	0.0588235	0.00244346	5	SERPING1,C1S,CFH,SERPINA5,ICAM1
KEGG Pathway	Ferroptosis	0.0731707	0.002499	3	ACSL3,FTH1,HMOX1
KEGG Pathway	PI3K-Akt signaling pathway	0.0225989	0.00251973	8	BCL2,CDKN1A,CHAD,COL2A1,COL9A3,COMP,FGF2,NFKB1
KEGG Pathway	Colorectal cancer	0.0465116	0.00254963	4	BCL2,CDKN1A,GADD45B,TGFBR2
KEGG Pathway	Alcoholic liver disease	0.0352113	0.00255483	5	CD14,NFKB1,NFKBIA,MAP2K6,SCD
KEGG Pathway	ECM-receptor interaction	0.0454545	0.00277138	4	CHAD,COL2A1,COL9A3,COMP
KEGG Pathway	Gastric cancer	0.033557	0.00314279	5	BCL2,CDKN1A,FGF2,GADD45B,TGFBR2
KEGG Pathway	Phagosome	0.0328947	0.00342244	5	CD14,COMP,TUBB2A,TUBA1A,COLEC12
KEGG Pathway	AGE-RAGE signaling pathway in diabetic complications	0.04	0.00438431	4	BCL2,ICAM1,NFKB1,TGFBR2
KEGG Pathway	Malaria	0.14	0.00439983	7	COMP,ICAM1,SDC2,CTSK,MMP3,MSN,EZR
KEGG Pathway	T cell receptor signaling pathway	0.0384615	0.00503778	4	MAP3K8,NFATC2,NFKB1,NFKBIA
KEGG Pathway	Hepatocellular carcinoma	0.0297619	0.00522328	5	CDKN1A,HMOX1,GADD45B,NFE2L2,TGFBR2
KEGG Pathway	Fatty acid metabolism	0.0526316	0.00635109	3	ACSL3,FADS1,SCD
KEGG Pathway	Human papillomavirus infection	0.021148	0.00658488	7	CDKN1A,CHAD,COL2A1,COL9A3,COMP,IRF1,NFKB1
KEGG Pathway	Basal cell carcinoma	0.047619	0.00837514	3	BMP2,CDKN1A,GADD45B
KEGG Pathway	Pathogenic Escherichia coli infection	0.0253807	0.0100391	5	NFKB1,NFKBIA,TUBB2A,EZR,TUBA1A
KEGG Pathway	Adipocytokine signaling pathway	0.0434783	0.0107373	3	ACSL3,NFKB1,NFKBIA
KEGG Pathway	Renal cell carcinoma	0.0724638	0.0107373	5	CDKN1A,ETS1,HIF1A,UBB,SQSTM1
KEGG Pathway	Amyotrophic lateral sclerosis	0.0192308	0.0107684	7	BCL2,HNRNPA2B1,MAP2K6,TUBB2A,TUBA1A,SQSTM1,HNRNPA3
KEGG Pathway	RIG-I-like receptor signaling pathway	0.0428571	0.0111646	3	CYLD,NFKB1,NFKBIA
KEGG Pathway	FoxO signaling pathway	0.0305344	0.0111977	4	CDKN1A,GADD45B,SOD2,TGFBR2
KEGG Pathway	Viral carcinogenesis	0.0245098	0.0115458	5	CDKN1A,NFKB1,NFKB2,NFKBIA,REL
KEGG Pathway	Melanoma	0.0416667	0.0120483	3	CDKN1A,FGF2,GADD45B
KEGG Pathway	Mitophagy - animal	0.0416667	0.0120483	3	HIF1A,UBB,SQSTM1
KEGG Pathway	p53 signaling pathway	0.0410959	0.0125048	3	BCL2,CDKN1A,GADD45B
KEGG Pathway	Yersinia infection	0.0291971	0.013022	4	NFATC2,NFKB1,NFKBIA,MAP2K6
KEGG Pathway	Chemical carcinogenesis - receptor activation	0.0235849	0.0134482	5	BCL2,CYP1B1,FGF2,NFKB1,KLF4
KEGG Pathway	Measles	0.028777	0.0136697	4	BCL2,MSN,NFKB1,NFKBIA
KEGG Pathway	RNA degradation	0.0379747	0.0154507	3	BTG1,BTG2,BTG3
KEGG Pathway	cAMP signaling pathway	0.0226244	0.0158292	5	NFKB1,NFKBIA,PDE4B,SOX9,SSTR2
KEGG Pathway	Breast cancer	0.0272109	0.0164637	4	CDKN1A,FGF2,GADD45B,NFKB2
KEGG Pathway	Spliceosome	0.0272109	0.0164637	4	DDX5,HNRNPC,HNRNPU,HNRNPA3
KEGG Pathway	B cell receptor signaling pathway	0.0365854	0.0170577	3	NFATC2,NFKB1,NFKBIA
KEGG Pathway	Peroxisome	0.0365854	0.0170577	3	ACSL3,PRDX1,SOD2
KEGG Pathway	MicroRNAs in cancer	0.0193548	0.0172107	6	BCL2,CDKN1A,CYP1B1,HMOX1,NFKB1,EZR
KEGG Pathway	Herpes simplex virus 1 infection	0.0161616	0.0173474	8	BIRC2,BIRC3,B2M,BCL2,NFKB1,NFKBIA,TAPBP,ZNF267
KEGG Pathway	Hepatitis C	0.0254777	0.0204269	4	CDKN1A,LDLR,NFKB1,NFKBIA
KEGG Pathway	Th1 and Th2 cell differentiation	0.0326087	0.0230659	3	NFATC2,NFKB1,NFKBIA
KEGG Pathway	Rheumatoid arthritis	0.0322581	0.023722	3	CTSK,ICAM1,MMP3
KEGG Pathway	IL-17 signaling pathway	0.0319149	0.0243882	3	MMP3,NFKB1,NFKBIA
KEGG Pathway	Staphylococcus aureus infection	0.03125	0.0257506	3	C1S,CFH,ICAM1
KEGG Pathway	Influenza A	0.0233918	0.0268866	4	FDPS,ICAM1,NFKB1,NFKBIA
KEGG Pathway	Chagas disease	0.0294118	0.0300786	3	NFKB1,NFKBIA,TGFBR2
KEGG Pathway	Amoebiasis	0.0294118	0.0300786	3	CD14,NFKB1,PRDX1
KEGG Pathway	Protein digestion and absorption	0.0291262	0.0308349	3	COL2A1,COL9A3,COL27A1
KEGG Pathway	Tuberculosis	0.0222222	0.0316159	4	BCL2,CD14,NFKB1,RIPK2
KEGG Pathway	Parathyroid hormone synthesis, secretion and action	0.0283019	0.0331634	3	BCL2,CDKN1A,PDE4B
KEGG Pathway	Pathways of neurodegeneration - multiple diseases	0.0147059	0.039044	7	BCL2,NFKB1,MAP2K6,TUBB2A,UBB,TUBA1A,SQSTM1
KEGG Pathway	Leukocyte transendothelial migration	0.0263158	0.0398068	3	ICAM1,MSN,EZR

## Sheet: FC
Category	Description	enrichment	pvalue	count	Symbols
KEGG Pathway	Focal adhesion	0.144279	6.85442e-10	29	CCND1,CAPN2,CAV1,CCND2,COL1A2,COL6A1,COL6A2,COL6A3,COMP,FN1,TNC,ITGB5,ITGB8,PDGFRA,PIK3R1,MYL9,CD44,HLA-E,HES1,RBPJ,IRF1,MAML2,GNG11,SGK1,DDIT4,COL3A1,COL5A2,COL12A1,SLC38A2
KEGG Pathway	ECM-receptor interaction	0.113636	3.90198e-08	10	CD44,COL1A2,COL6A1,COL6A2,COL6A3,COMP,FN1,TNC,ITGB5,ITGB8
KEGG Pathway	Human papillomavirus infection	0.0513595	1.39238e-07	17	CCND1,CCND2,COL1A2,COL6A1,COL6A2,COL6A3,COMP,FN1,HLA-E,HES1,TNC,RBPJ,IRF1,ITGB5,ITGB8,PIK3R1,MAML2
KEGG Pathway	Shigellosis	0.0728745	5.53466e-07	18	CAPN2,CAST,CD44,H3-3B,IL1R1,NFKBIA,PFN1,PIK3R1,UBB,CALCOCO2,MYL9,PYCARD,SEPTIN11,STING1,GAPDH,RRAS,AHNAK,AHNAK2
KEGG Pathway	Cellular senescence	0.230769	1.10275e-06	36	CCND1,ZFP36L1,ZFP36L2,CAPN2,CCND2,GADD45A,HLA-E,GADD45B,PIK3R1,PPP3CA,RRAS,B2M,CD44,HES1,RBPJ,NFKBIA,VIM,CTSD,CTSK,LMNA,PMAIP1,CTSF,BMP4,FN1,GLI3,GNG11,GSTM3,MGST3,PDGFRA,TPM3,APPL1,CAMK1D,SGK1,SOD2,IL1R1,VCAM1
KEGG Pathway	PI3K-Akt signaling pathway	0.0451977	1.75262e-06	16	CCND1,CCND2,COL1A2,COL6A1,COL6A2,COL6A3,COMP,FN1,GNG11,TNC,ITGB5,ITGB8,PDGFRA,PIK3R1,SGK1,DDIT4
KEGG Pathway	Epstein-Barr virus infection	0.0594059	2.20076e-06	12	B2M,CCND1,CCND2,CD44,GADD45A,HLA-E,HES1,RBPJ,GADD45B,NFKBIA,PIK3R1,VIM
KEGG Pathway	Apoptosis	0.0735294	2.3316e-06	10	CAPN2,CTSD,CTSK,GADD45A,LMNA,GADD45B,NFKBIA,PIK3R1,PMAIP1,CTSF
KEGG Pathway	Proteoglycans in cancer	0.0585366	1.52477e-05	12	ANK3,CCND1,CAV1,CD44,COL1A2,FN1,ITGB5,LUM,PIK3R1,PLAUR,RRAS,SEPTIN11
KEGG Pathway	Protein digestion and absorption	0.0776699	1.61775e-05	8	COL1A2,COL3A1,COL5A2,COL6A1,COL6A2,COL6A3,COL12A1,SLC38A2
KEGG Pathway	Fluid shear stress and atherosclerosis	0.0719424	2.08825e-05	10	BMP4,CAV1,CYBA,DUSP1,GSTM3,IL1R1,MGST3,PIK3R1,VCAM1,MYL9
KEGG Pathway	Regulation of actin cytoskeleton	0.0779817	2.69489e-05	17	DIAPH2,FN1,ITGB5,ITGB8,PDGFRA,PFN1,PIK3R1,RRAS,TMSB4X,MYL9,ENAH,DPYSL2,PPP3CA,ID1,ATP2B4,GLI3,NFKBIA
KEGG Pathway	Pathways in cancer	0.0320151	7.30369e-05	17	CCND1,BMP4,CCND2,GADD45A,FN1,GLI3,GNG11,GSTM3,HES1,MGST3,GADD45B,NFKBIA,PDGFRA,PIK3R1,PMAIP1,TPM3,APPL1
KEGG Pathway	Osteoclast differentiation	0.257812	7.71412e-05	33	CTSK,CYBA,IL1R1,JUNB,NFKBIA,PIK3R1,PPP3CA,SOCS3,B2M,CCND1,GNG11,HLA-E,PDGFRA,STING1,MAP3K8,IRF1,VCAM1,CANX,CCND2,RRAS,PYCARD,RCAN1,UBB,RBPJ,PMAIP1,SP100,ZEB1,SOD2,KPNA2,CALCOCO2,CD81,RACK1,BMP4
KEGG Pathway	Glioma	0.08	0.00016011	6	CCND1,GADD45A,GADD45B,PDGFRA,PIK3R1,CAMK1D
KEGG Pathway	Human cytomegalovirus infection	0.0444444	0.000177242	10	B2M,CCND1,GNG11,HLA-E,IL1R1,NFKBIA,PDGFRA,PIK3R1,PPP3CA,STING1
KEGG Pathway	Malaria	0.1	0.000199456	5	CD81,COMP,GYPC,LRP1,VCAM1
KEGG Pathway	TNF signaling pathway	0.0625	0.000216282	7	MAP3K8,IRF1,JUNB,NFKBIA,PIK3R1,VCAM1,SOCS3
KEGG Pathway	Transcriptional misregulation in cancer	0.0466321	0.000260651	9	CCND2,GADD45A,FUS,H3-3B,ID2,GADD45B,ZEB1,NUPR1,NFKBIZ
KEGG Pathway	Colorectal cancer	0.0697674	0.00033868	6	CCND1,GADD45A,GADD45B,PIK3R1,PMAIP1,APPL1
KEGG Pathway	Hypertrophic cardiomyopathy	0.0777778	0.000432705	7	ITGB5,ITGB8,LMNA,SGCB,TPM3,TPM4,GJA1
KEGG Pathway	Viral myocarditis	0.0833333	0.000470985	5	ABL2,CCND1,CAV1,HLA-E,SGCB
KEGG Pathway	Small cell lung cancer	0.0652174	0.000486766	6	CCND1,GADD45A,FN1,GADD45B,NFKBIA,PIK3R1
KEGG Pathway	TGF-beta signaling pathway	0.117021	0.000545945	11	BMP4,ID1,ID2,ID3,INHBA,NBL1,ZFHX3,PIK3R1,CCND1,CCND2,SNAI2
KEGG Pathway	FoxO signaling pathway	0.0534351	0.000560292	7	CCND1,CCND2,GADD45A,GADD45B,PIK3R1,SGK1,SOD2
KEGG Pathway	MicroRNAs in cancer	0.0354839	0.000586203	11	CCND1,CCND2,CD44,TNC,PDGFRA,PIK3R1,SOX4,ZEB1,VIM,ZEB2,DDIT4
KEGG Pathway	Dilated cardiomyopathy	0.0625	0.000610568	6	ITGB5,ITGB8,LMNA,SGCB,TPM3,TPM4
KEGG Pathway	Thyroid cancer	0.108108	0.000657281	4	CCND1,GADD45A,GADD45B,TPM3
KEGG Pathway	Human T-cell leukemia virus 1 infection	0.0405405	0.000719198	9	B2M,CCND1,CANX,CCND2,HLA-E,IL1R1,NFKBIA,PIK3R1,PPP3CA
KEGG Pathway	Chemical carcinogenesis - reactive oxygen species	0.0717489	0.000742511	16	ABL2,CYBA,AKR1C2,GSTM3,MGST3,NDUFB2,NFKBIA,PIK3R1,SOD2,PMAIP1,REV3L,GPX1,GPX8,TYMP,CMPK1,ADH5
KEGG Pathway	AGE-RAGE signaling pathway in diabetic complications	0.14	0.000757498	14	CCND1,COL1A2,COL3A1,FN1,PIK3R1,VCAM1,CTSD,CYBA,GAPDH,NDUFB2,PDK4,IL1R1,GNG11,NFKBIA
KEGG Pathway	Glycolysis / Gluconeogenesis	0.119403	0.000783383	8	ADH5,ALDH3A2,ENO1,GAPDH,TPI1,BCAT1,GLUL,ESD
KEGG Pathway	C-type lectin receptor signaling pathway	0.0576923	0.000930354	6	IRF1,NFKBIA,PIK3R1,PPP3CA,RRAS,PYCARD
KEGG Pathway	Signaling pathways regulating pluripotency of stem cells	0.048951	0.000940811	7	ZFHX3,BMP4,ID1,ID2,ID3,INHBA,PIK3R1
KEGG Pathway	Prolactin signaling pathway	0.0714286	0.000956346	5	CCND1,CCND2,IRF1,PIK3R1,SOCS3
KEGG Pathway	Melanoma	0.0694444	0.00108644	5	CCND1,GADD45A,GADD45B,PDGFRA,PIK3R1
KEGG Pathway	p53 signaling pathway	0.0684932	0.00115619	5	CCND1,CCND2,GADD45A,GADD45B,PMAIP1
KEGG Pathway	Platinum drug resistance	0.0684932	0.00115619	5	GSTM3,MGST3,PIK3R1,PMAIP1,REV3L
KEGG Pathway	Kaposi sarcoma-associated herpesvirus infection	0.0412371	0.00126166	8	CCND1,RCAN1,GNG11,HLA-E,NFKBIA,PIK3R1,PPP3CA,UBB
KEGG Pathway	Biosynthesis of amino acids	0.0666667	0.00130556	5	BCAT1,ENO1,GAPDH,GLUL,TPI1
KEGG Pathway	Chronic myeloid leukemia	0.0657895	0.00138537	5	CCND1,GADD45A,GADD45B,NFKBIA,PIK3R1
KEGG Pathway	Arrhythmogenic right ventricular cardiomyopathy	0.0649351	0.00146872	5	GJA1,ITGB5,ITGB8,LMNA,SGCB
KEGG Pathway	Diabetic cardiomyopathy	0.0394089	0.00168056	8	COL1A2,COL3A1,CTSD,CYBA,GAPDH,NDUFB2,PDK4,PIK3R1
KEGG Pathway	Viral carcinogenesis	0.0392157	0.00173317	8	CCND1,CCND2,HLA-E,RBPJ,NFKBIA,PIK3R1,PMAIP1,SP100
KEGG Pathway	Complement and coagulation cascades	0.117647	0.00227429	10	C1R,C1S,CLU,CFD,PLAUR,IRF1,PYCARD,NFKBIA,PIK3R1,STING1
KEGG Pathway	Hedgehog signaling pathway	0.0714286	0.00311505	4	CCND1,CCND2,GLI3,CDON
KEGG Pathway	Endometrial cancer	0.0689655	0.00353847	4	CCND1,GADD45A,GADD45B,PIK3R1
KEGG Pathway	Glutathione metabolism	0.0689655	0.00353847	4	GPX1,GSTM3,MGST3,GPX8
KEGG Pathway	Notch signaling pathway	0.101695	0.00376414	6	HES1,RBPJ,TLE4,MAML2,NFKBIA,PPP3CA
KEGG Pathway	Mineral absorption	0.116667	0.00399937	7	ATP2B4,FTH1,FTL,MT1E,CAPN2,GLUL,PYCARD
KEGG Pathway	Prostate cancer	0.0515464	0.00402623	5	CCND1,NFKBIA,PDGFRA,PIK3R1,ZEB1
KEGG Pathway	Basal cell carcinoma	0.0634921	0.00476423	4	BMP4,GADD45A,GLI3,GADD45B
KEGG Pathway	Amoebiasis	0.0490196	0.00498305	5	COL1A2,COL3A1,FN1,IL1R1,PIK3R1
KEGG Pathway	NF-kappa B signaling pathway	0.0480769	0.0054074	5	GADD45A,IL1R1,GADD45B,NFKBIA,VCAM1
KEGG Pathway	Salmonella infection	0.0321285	0.00580295	8	GAPDH,NFKBIA,PFN1,RRAS,MYL9,PYCARD,AHNAK,AHNAK2
KEGG Pathway	Hippo signaling pathway	0.0382166	0.00722855	6	CCND1,BMP4,CCND2,ID1,ID2,SNAI2
KEGG Pathway	Non-small cell lung cancer	0.0555556	0.00763267	4	CCND1,GADD45A,GADD45B,PIK3R1
KEGG Pathway	Carbon metabolism	0.0434783	0.00820648	5	ADH5,ENO1,ESD,GAPDH,TPI1
KEGG Pathway	Human immunodeficiency virus 1 infection	0.0330189	0.00833877	7	B2M,GNG11,HLA-E,NFKBIA,PIK3R1,PPP3CA,STING1
KEGG Pathway	Lipid and atherosclerosis	0.0325581	0.00896889	7	CYBA,NFKBIA,PIK3R1,PPP3CA,SOD2,VCAM1,PYCARD
KEGG Pathway	Pancreatic cancer	0.0526316	0.00920655	4	CCND1,GADD45A,GADD45B,PIK3R1
KEGG Pathway	Pertussis	0.0526316	0.00920655	4	C1R,C1S,IRF1,PYCARD
KEGG Pathway	Bacterial invasion of epithelial cells	0.0519481	0.00963055	4	CAV1,FN1,PIK3R1,SEPTIN11
KEGG Pathway	Hepatocellular carcinoma	0.0357143	0.00991126	6	CCND1,GADD45A,GSTM3,MGST3,GADD45B,PIK3R1
KEGG Pathway	Influenza A	0.0350877	0.0107514	6	KPNA2,NFKBIA,PIK3R1,SOCS3,CALCOCO2,PYCARD
KEGG Pathway	Drug metabolism - other enzymes	0.05	0.010978	4	TYMP,GSTM3,MGST3,CMPK1
KEGG Pathway	B cell receptor signaling pathway	0.0487805	0.0119404	4	CD81,NFKBIA,PIK3R1,PPP3CA
KEGG Pathway	Relaxin signaling pathway	0.0387597	0.0130466	5	COL1A2,COL3A1,GNG11,NFKBIA,PIK3R1
KEGG Pathway	Axon guidance	0.032967	0.0142642	6	DPYSL2,PIK3R1,PPP3CA,RRAS,MYL9,ENAH
KEGG Pathway	Measles	0.0359712	0.017493	5	CCND1,CCND2,NFKBIA,PIK3R1,RACK1
KEGG Pathway	Th1 and Th2 cell differentiation	0.0434783	0.0175581	4	RBPJ,NFKBIA,PPP3CA,MAML2
KEGG Pathway	Breast cancer	0.0340136	0.0216973	5	CCND1,GADD45A,HES1,GADD45B,PIK3R1
KEGG Pathway	Toll-like receptor signaling pathway	0.0384615	0.0261705	4	MAP3K8,CTSK,NFKBIA,PIK3R1
KEGG Pathway	T cell receptor signaling pathway	0.0384615	0.0261705	4	MAP3K8,NFKBIA,PIK3R1,PPP3CA
KEGG Pathway	Rap1 signaling pathway	0.0285714	0.0266406	6	ID1,PDGFRA,PFN1,PIK3R1,RRAS,ENAH
KEGG Pathway	Hepatitis C	0.0318471	0.0278106	5	CCND1,CD81,NFKBIA,PIK3R1,SOCS3
KEGG Pathway	Necroptosis	0.0314465	0.0291515	5	CAPN2,FTH1,FTL,GLUL,PYCARD
KEGG Pathway	JAK-STAT signaling pathway	0.0308642	0.0312383	5	CCND1,CCND2,PDGFRA,PIK3R1,SOCS3
KEGG Pathway	cAMP signaling pathway	0.0271493	0.0330018	6	ATP2B4,GLI3,NFKBIA,PIK3R1,RRAS,MYL9
KEGG Pathway	Leukocyte transendothelial migration	0.0350877	0.034985	4	CYBA,PIK3R1,VCAM1,MYL9
KEGG Pathway	Chemical carcinogenesis - DNA adducts	0.0434783	0.0384461	3	AKR1C2,GSTM3,MGST3
KEGG Pathway	Coronavirus disease - COVID-19	0.0258621	0.0402752	6	C1R,C1S,CFD,NFKBIA,PIK3R1,STING1
KEGG Pathway	Thyroid hormone signaling pathway	0.0330579	0.042061	4	CCND1,BMP4,RCAN1,PIK3R1
KEGG Pathway	Drug metabolism - cytochrome P450	0.0416667	0.0427592	3	ADH5,GSTM3,MGST3
KEGG Pathway	Cell cycle	0.031746	0.0475742	4	CCND1,CCND2,GADD45A,GADD45B

## Sheet: preHTC
Category	Description	enrichment	pvalue	count	Symbols
KEGG Pathway	Focal adhesion	0.149254	2.02972e-10	30	BIRC3,CCND1,CAV1,CCND2,CCND3,COL6A2,COL6A3,COL9A3,COMP,FN1,PAK2,PDGFA,PIK3R1,PPP1CB,SPP1,AKT3,PARVA,CDK6,EIF4EBP1,FGF2,JAK1,PKN1,RHEB,SGK1,YWHAH,DDIT4,HLA-G,ATP6V0E1,COL10A1,SLC1A1
KEGG Pathway	PI3K-Akt signaling pathway	0.059322	1.08827e-09	21	CCND1,CCND2,CCND3,CDK6,COL6A2,COL6A3,COL9A3,COMP,EIF4EBP1,FGF2,FN1,JAK1,PDGFA,PIK3R1,PKN1,RHEB,SGK1,SPP1,YWHAH,AKT3,DDIT4
KEGG Pathway	Cellular senescence	0.320513	2.72062e-07	50	CCND1,CCND2,CCND3,CDK6,EIF4EBP1,HLA-G,PIK3R1,PPP1CB,RHEB,RRAS,TGFBR2,AKT3,AXL,FGF2,JAK1,PDGFA,TSPO,HLA-DQB1,IL1R1,PTK2B,AKAP13,BIRC3,FN1,RARB,CYBA,FHL2,TNFRSF11B,CD14,ZBTB16,VIM,CBLB,PTPN11,ABL2,PAK2,SGK1,SOD2,SLC44A2,ELOB,LDHA,TF,RCAN1,CD81,YWHAH,MMP3,CRYAB,DDIT4,ARHGDIB,RIPK2,INHBA,SPP1
KEGG Pathway	Human papillomavirus infection	0.0513595	3.36927e-07	17	CCND1,CCND2,CCND3,CDK6,COL6A2,COL6A3,COL9A3,COMP,EIF4EBP1,FN1,HLA-G,JAK1,PIK3R1,RHEB,SPP1,ATP6V0E1,AKT3
KEGG Pathway	Chemical carcinogenesis - reactive oxygen species	0.0941704	1.1424e-05	21	ABL2,COX7A1,CYBA,AKR1C2,NDUFB2,PIK3R1,PTPN11,SOD2,UQCRC1,COX5A,AKT3,UQCR11,PPP1CB,TGFBR2,ATP6V0E1,AP2S1,CLTB,GPX3,CAV1,DUSP1,MAOA
KEGG Pathway	Proteoglycans in cancer	0.0829268	2.71208e-05	17	CCND1,CAV1,DCN,FGF2,FN1,PIK3R1,PPP1CB,PTPN11,RRAS,IQGAP1,AKT3,PAK2,PDGFA,TMSB4X,CLTB,PTK2B,PKN1
KEGG Pathway	EGFR tyrosine kinase inhibitor resistance	0.0886076	3.48678e-05	7	AXL,EIF4EBP1,FGF2,JAK1,PDGFA,PIK3R1,AKT3
KEGG Pathway	Human T-cell leukemia virus 1 infection	0.0495495	5.60335e-05	11	CCND1,TSPO,CCND2,CCND3,HLA-DQB1,HLA-G,IL1R1,JAK1,PIK3R1,TGFBR2,AKT3
KEGG Pathway	Human cytomegalovirus infection	0.0488889	6.32246e-05	11	CCND1,CDK6,EIF4EBP1,PTK2B,HLA-G,IL1R1,JAK1,PIK3R1,RHEB,AKT3,AKAP13
KEGG Pathway	Viral myocarditis	0.183333	6.44209e-05	11	ABL2,CCND1,CAV1,CD55,HLA-DQB1,HLA-G,CD14,COMP,CYBA,ATP6V0E1,CPE
KEGG Pathway	Small cell lung cancer	0.076087	9.28135e-05	7	BIRC3,CCND1,CDK6,FN1,PIK3R1,RARB,AKT3
KEGG Pathway	Osteoclast differentiation	0.0625	0.000118868	8	CYBA,FHL2,IL1R1,JAK1,TNFRSF11B,PIK3R1,TGFBR2,AKT3
KEGG Pathway	Acute myeloid leukemia	0.0895522	0.000120072	6	CCND1,CD14,EIF4EBP1,PIK3R1,ZBTB16,AKT3
KEGG Pathway	Epstein-Barr virus infection	0.049505	0.000122254	10	CCND1,CCND2,CCND3,CDK6,HLA-DQB1,HLA-G,JAK1,PIK3R1,VIM,AKT3
KEGG Pathway	Diabetic cardiomyopathy	0.0492611	0.000127305	10	COX7A1,CYBA,NDUFB2,PIK3R1,PPP1CB,TGFBR2,UQCRC1,COX5A,AKT3,UQCR11
KEGG Pathway	Salmonella infection	0.0562249	0.000155014	14	ANXA2,BIRC3,CD14,PKN1,RRAS,S100A10,DYNLT3,RIPK2,AKT3,AHNAK,AHNAK2,CYBA,JAK1,TXNIP
KEGG Pathway	Melanoma	0.0833333	0.000179187	6	CCND1,CDK6,FGF2,PDGFA,PIK3R1,AKT3
KEGG Pathway	Measles	0.057554	0.00020999	8	CCND1,CBLB,CCND2,CCND3,CDK6,JAK1,PIK3R1,AKT3
KEGG Pathway	Pancreatic cancer	0.0789474	0.000241307	6	CCND1,CDK6,JAK1,PIK3R1,TGFBR2,AKT3
KEGG Pathway	Chronic myeloid leukemia	0.0789474	0.000241307	6	CCND1,CDK6,PIK3R1,PTPN11,TGFBR2,AKT3
KEGG Pathway	ErbB signaling pathway	0.0705882	0.000442931	6	ABL2,CBLB,EIF4EBP1,PAK2,PIK3R1,AKT3
KEGG Pathway	Hippo signaling pathway	0.10828	0.000477209	17	BIRC3,CCND1,CCND2,CCND3,CCN2,PPP1CB,TGFBR2,YWHAH,CDK6,WIF1,DAAM1,RSPO2,STMN1,PDGFA,PIK3R1,VIM,DDIT4
KEGG Pathway	ECM-receptor interaction	0.0681818	0.00053334	6	COL6A2,COL6A3,COL9A3,COMP,FN1,SPP1
KEGG Pathway	JAK-STAT signaling pathway	0.0493827	0.000587161	8	CCND1,CCND2,CCND3,JAK1,PDGFA,PIK3R1,PTPN11,AKT3
KEGG Pathway	Mineral absorption	0.0833333	0.000625197	5	MT1E,MT1M,MT1X,MT2A,TF
KEGG Pathway	FoxO signaling pathway	0.0534351	0.000809165	7	CCND1,CCND2,PIK3R1,SGK1,SOD2,TGFBR2,AKT3
KEGG Pathway	Choline metabolism in cancer	0.0612245	0.000941694	6	EIF4EBP1,PDGFA,PIK3R1,RHEB,AKT3,SLC44A2
KEGG Pathway	Regulation of actin cytoskeleton	0.0412844	0.000982112	9	FGF2,FN1,PAK2,PDGFA,PIK3R1,PPP1CB,RRAS,TMSB4X,IQGAP1
KEGG Pathway	Fluid shear stress and atherosclerosis	0.0935252	0.0011448	13	CAV1,CYBA,DUSP1,IL1R1,PDGFA,PIK3R1,AKT3,CD14,FGF2,STMN1,PAK2,RRAS,TGFBR2
KEGG Pathway	Renal cell carcinoma	0.0724638	0.0011831	5	PAK2,PIK3R1,PTPN11,ELOB,AKT3
KEGG Pathway	Pathways in cancer	0.0282486	0.00132954	15	BIRC3,CCND1,CCND2,CCND3,CDK6,FGF2,FN1,JAK1,PDGFA,PIK3R1,RARB,ELOB,TGFBR2,ZBTB16,AKT3
KEGG Pathway	Non-small cell lung cancer	0.0694444	0.00143241	5	CCND1,CDK6,PIK3R1,RARB,AKT3
KEGG Pathway	HIF-1 signaling pathway	0.0550459	0.00163159	6	EIF4EBP1,LDHA,PIK3R1,ELOB,TF,AKT3
KEGG Pathway	Phospholipase D signaling pathway	0.0472973	0.00164349	7	PTK2B,PDGFA,PIK3R1,PTPN11,RHEB,RRAS,AKT3
KEGG Pathway	Glioma	0.0666667	0.00171841	5	CCND1,CDK6,PDGFA,PIK3R1,AKT3
KEGG Pathway	Kaposi sarcoma-associated herpesvirus infection	0.0412371	0.00186877	8	CCND1,CDK6,RCAN1,FGF2,HLA-G,JAK1,PIK3R1,AKT3
KEGG Pathway	Non-alcoholic fatty liver disease	0.0451613	0.00213679	7	COX7A1,NDUFB2,PIK3R1,UQCRC1,COX5A,AKT3,UQCR11
KEGG Pathway	MAPK signaling pathway	0.0340136	0.0022341	10	CD14,DUSP1,FGF2,IL1R1,STMN1,PAK2,PDGFA,RRAS,TGFBR2,AKT3
KEGG Pathway	Hepatitis C	0.044586	0.00229682	7	CCND1,CD81,CDK6,JAK1,PIK3R1,YWHAH,AKT3
KEGG Pathway	Viral carcinogenesis	0.0392157	0.00255207	8	CCND1,CCND2,CCND3,CDK6,HLA-G,JAK1,PIK3R1,YWHAH
KEGG Pathway	Cysteine and methionine metabolism	0.0784314	0.00276984	4	BCAT1,CDO1,LDHA,MPST
KEGG Pathway	Arginine and proline metabolism	0.0784314	0.00276984	4	ARG2,CKB,MAOA,P4HA2
KEGG Pathway	Nucleotide metabolism	0.0588235	0.00297674	5	ADSS2,CDA,TYMP,NT5E,UPP1
KEGG Pathway	Longevity regulating pathway	0.0561798	0.00363	5	EIF4EBP1,PIK3R1,RHEB,SOD2,AKT3
KEGG Pathway	Pyrimidine metabolism	0.0689655	0.0044175	4	CDA,TYMP,NT5E,UPP1
KEGG Pathway	Oxidative phosphorylation	0.0447761	0.00456338	6	COX7A1,NDUFB2,UQCRC1,ATP6V0E1,COX5A,UQCR11
KEGG Pathway	TGF-beta signaling pathway	0.0531915	0.00458375	5	DCN,FMOD,INHBA,NBL1,TGFBR2
KEGG Pathway	Insulin signaling pathway	0.0437956	0.00507888	6	CBLB,EIF4EBP1,PIK3R1,PPP1CB,RHEB,AKT3
KEGG Pathway	Prostate cancer	0.0515464	0.00523473	5	CCND1,MMP3,PDGFA,PIK3R1,AKT3
KEGG Pathway	Ras signaling pathway	0.0344828	0.0055287	8	ABL2,FGF2,PAK2,PDGFA,PIK3R1,PTPN11,RRAS,AKT3
KEGG Pathway	Longevity regulating pathway - multiple species	0.0645161	0.00560487	4	CRYAB,PIK3R1,SOD2,AKT3
KEGG Pathway	AGE-RAGE signaling pathway in diabetic complications	0.05	0.00594856	5	CCND1,FN1,PIK3R1,TGFBR2,AKT3
KEGG Pathway	Amoebiasis	0.107843	0.00646086	11	ARG2,CD14,FN1,IL1R1,PIK3R1,CAPNS1,CAST,RIPK2,AKT3,CD55,HLA-DQB1
KEGG Pathway	Protein digestion and absorption	0.0485437	0.00672826	5	COL6A2,COL6A3,COL9A3,COL10A1,SLC1A1
KEGG Pathway	C-type lectin receptor signaling pathway	0.0480769	0.00700332	5	CBLB,PIK3R1,PTPN11,RRAS,AKT3
KEGG Pathway	Transcriptional misregulation in cancer	0.0362694	0.00707143	7	BIRC3,CCND2,CD14,MMP3,PDGFA,TGFBR2,ZBTB16
KEGG Pathway	Gastric cancer	0.0402685	0.00757449	6	CCND1,FGF2,PIK3R1,RARB,TGFBR2,AKT3
KEGG Pathway	Phagosome	0.0394737	0.0083161	6	CD14,COMP,CYBA,HLA-DQB1,HLA-G,ATP6V0E1
KEGG Pathway	Prolactin signaling pathway	0.0571429	0.00857995	4	CCND1,CCND2,PIK3R1,AKT3
KEGG Pathway	Endocytosis	0.0398406	0.00871074	10	CAV1,CBLB,AP2S1,CLTB,HLA-G,TGFBR2,SNX3,SH3KBP1,SLC1A1,ATP6V0E1
KEGG Pathway	Huntington disease	0.0294118	0.00916871	9	AP2S1,CLTB,COX7A1,GPX3,NDUFB2,SOD2,UQCRC1,COX5A,UQCR11
KEGG Pathway	mTOR signaling pathway	0.0384615	0.00938417	6	EIF4EBP1,PIK3R1,RHEB,SGK1,AKT3,DDIT4
KEGG Pathway	p53 signaling pathway	0.0547945	0.00991766	4	CCND1,CCND2,CCND3,CDK6
KEGG Pathway	Bacterial invasion of epithelial cells	0.0519481	0.0119017	4	CAV1,CLTB,FN1,PIK3R1
KEGG Pathway	Neurotrophin signaling pathway	0.0420168	0.0121193	5	ARHGDIB,PIK3R1,PTPN11,RIPK2,AKT3
KEGG Pathway	Synaptic vesicle cycle	0.0512821	0.0124346	4	AP2S1,CLTB,SLC1A1,ATP6V0E1
KEGG Pathway	AMPK signaling pathway	0.0416667	0.012531	5	CCND1,EIF4EBP1,PIK3R1,RHEB,AKT3
KEGG Pathway	Wnt signaling pathway	0.0359281	0.012821	6	CCND1,CCND2,CCND3,WIF1,DAAM1,RSPO2
KEGG Pathway	Thyroid hormone signaling pathway	0.0413223	0.012952	5	CCND1,RCAN1,PIK3R1,RHEB,AKT3
KEGG Pathway	Type I diabetes mellitus	0.0697674	0.0131193	3	CPE,HLA-DQB1,HLA-G
KEGG Pathway	Prion disease	0.029304	0.013916	8	CAV1,COX7A1,CYBA,NDUFB2,PIK3R1,UQCRC1,COX5A,UQCR11
KEGG Pathway	Influenza A	0.0350877	0.0142646	6	CCND3,CDK6,HLA-DQB1,JAK1,PIK3R1,AKT3
KEGG Pathway	Cell cycle	0.0396825	0.0152007	5	CCND1,CCND2,CCND3,CDK6,YWHAH
KEGG Pathway	Complement and coagulation cascades	0.0470588	0.0165925	4	A2M,CLU,CD55,TFPI
KEGG Pathway	Colorectal cancer	0.0465116	0.0172491	4	CCND1,PIK3R1,TGFBR2,AKT3
KEGG Pathway	Cardiac muscle contraction	0.045977	0.0179217	4	COX7A1,UQCRC1,COX5A,UQCR11
KEGG Pathway	PD-L1 expression and PD-1 checkpoint pathway in cancer	0.0449438	0.0193155	4	JAK1,PIK3R1,PTPN11,AKT3
KEGG Pathway	NOD-like receptor signaling pathway	0.0326087	0.0197318	6	BIRC3,CYBA,JAK1,PKN1,RIPK2,TXNIP
KEGG Pathway	Yersinia infection	0.0364964	0.0210317	5	PTK2B,FN1,PIK3R1,PKN1,AKT3
KEGG Pathway	Apelin signaling pathway	0.0359712	0.0222283	5	CCND1,CCN2,RRAS,SPP1,AKT3
KEGG Pathway	Autophagy - animal	0.035461	0.0234683	5	PIK3R1,RHEB,RRAS,AKT3,DDIT4
KEGG Pathway	Shigellosis	0.0283401	0.0243533	7	CAPNS1,CAST,CD14,IL1R1,PIK3R1,RIPK2,AKT3
KEGG Pathway	Signaling pathways regulating pluripotency of stem cells	0.034965	0.024752	5	FGF2,INHBA,JAK1,PIK3R1,AKT3
KEGG Pathway	Hematopoietic cell lineage	0.040404	0.0272755	4	CD14,CD55,HLA-DQB1,IL1R1
KEGG Pathway	MicroRNAs in cancer	0.0258065	0.0272823	8	CCND1,CCND2,CDK6,STMN1,PDGFA,PIK3R1,VIM,DDIT4
KEGG Pathway	Breast cancer	0.0340136	0.027453	5	CCND1,CDK6,FGF2,PIK3R1,AKT3
KEGG Pathway	Endometrial cancer	0.0517241	0.0289515	3	CCND1,PIK3R1,AKT3
KEGG Pathway	Toll-like receptor signaling pathway	0.0384615	0.0318898	4	CD14,PIK3R1,SPP1,AKT3
KEGG Pathway	T cell receptor signaling pathway	0.0384615	0.0318898	4	CBLB,PAK2,PIK3R1,AKT3
KEGG Pathway	Oxytocin signaling pathway	0.0324675	0.0326157	5	CCND1,RCAN1,MYL6,PPP1CB,RGS2
KEGG Pathway	Parkinson disease	0.0263158	0.034398	7	COX7A1,DUSP1,MAOA,NDUFB2,UQCRC1,COX5A,UQCR11
KEGG Pathway	Insulin resistance	0.037037	0.035891	4	PIK3R1,PPP1CB,PTPN11,AKT3
KEGG Pathway	Th17 cell differentiation	0.0555556	0.035891	6	HLA-DQB1,IL1R1,JAK1,TGFBR2,BIRC3,AKT3
KEGG Pathway	Human immunodeficiency virus 1 infection	0.0283019	0.0359754	6	PTK2B,HLA-G,PAK2,PIK3R1,ELOB,AKT3
KEGG Pathway	Chemical carcinogenesis - receptor activation	0.0283019	0.0359754	6	CCND1,CCND3,EIF4EBP1,FGF2,PIK3R1,AKT3
KEGG Pathway	GnRH secretion	0.046875	0.0372	3	PIK3R1,SPP1,AKT3
KEGG Pathway	Lipid and atherosclerosis	0.027907	0.0381065	6	CD14,CYBA,MMP3,PIK3R1,SOD2,AKT3
KEGG Pathway	Hepatitis B	0.0308642	0.0392118	5	PTK2B,JAK1,PIK3R1,TGFBR2,AKT3
KEGG Pathway	TNF signaling pathway	0.0357143	0.0401694	4	BIRC3,MMP3,PIK3R1,AKT3
KEGG Pathway	Toxoplasmosis	0.0357143	0.0401694	4	BIRC3,HLA-DQB1,JAK1,AKT3
KEGG Pathway	Leukocyte transendothelial migration	0.0350877	0.0424127	4	CYBA,PTK2B,PIK3R1,PTPN11
KEGG Pathway	Hepatocellular carcinoma	0.0297619	0.044655	5	CCND1,CDK6,PIK3R1,TGFBR2,AKT3
KEGG Pathway	Central carbon metabolism in cancer	0.0428571	0.0465179	3	LDHA,PIK3R1,AKT3
